# Supplementary material for: Immune responses in carp strains with different susceptibility to carp edema virus disease
Source: PeerJ. 2023 Jul 14;11:e15614. doi: 10.7717/peerj.15614 (PMC10351508; doi:10.7717/peerj.15614)
Supplement: Data S1 — The data shows the normalization of selected immune genes in each fish with 40S ribosomal protein S11. [file peerj-11-15614-s003.xlsx]

## Sheet: Genogroup IIa 
	40S		IGM		MX2		CD8b1		CD4		IL6a		Tnfa2		IL10		IL1b		GZMA		mucb5			CEV, normalization											CEV, normalization													CEV, normalization
	Cohabiation IV		Cohabiation IV		Cohabiation IV		Cohabiation IV		Cohabiation IV		Cohabiation IV		Cohabiation IV		Cohabiation IV		Cohabiation IV		Cohabiation IV		Cohabiation IV			CO IV											CO IV (Day 6)													CO IV (Day 6)
	Sample Name	Quantity Mean	Sample Name	Quantity Mean	Sample Name	Quantity Mean	Sample Name	Quantity Mean	Sample Name	Quantity Mean	Sample Name	Quantity Mean	Sample Name	Quantity Mean	Sample Name	Quantity Mean	Sample Name	Quantity Mean	Sample Name	Quantity Mean	Sample Name	Quantity Mean
																									IGM	MX2	CD8b1	CD4	IL6a	Tnfa2	IL10	IL1b	GZMA	mucb5			IGM	MX2	CD8b1	CD4	IL6a	Tnfa2	IL10	IL1b	GZMA	Muc5b			IGM
	AS 5	1.01131e+06	AS 5	39682.4	AS 5	2035348	AS 5	8561.24	AS 5	13200.6	AS 5	3285.94	AS 5	1210.25	AS 5	2973.95	AS 5	9409.78	AS 5	6221.25	AS 5	539266		AS 5	3923.85	201258	846.546	1305.29	324.918	119.672	294.068	930.452	615.165	53323.3		AS 5	3923.85	201258	846.546	1305.29	324.918	119.672	294.068	930.452	615.165	53323.3		AS 9	2371.99
	AS 6	996172	AS 6	32335.9	AS 6	1.4272e+06	AS 6	9498.87	AS 6	11747.7	AS 6	3153.17	AS 6	687.981	AS 6	3104.35	AS 6	2850.3	AS 6	3535.6	AS 6	1573838		AS 6	3246.02	143269	953.537	1179.29	316.529	69.0625	311.628	286.126	354.919	157989		AS 6	3246.02	143269	953.537	1179.29	316.529	69.0625	311.628	286.126	354.919	157989		AS 10	2466.95
	AS 7	738861	AS 7	3730.63	AS 7	1.38707e+06	AS 7	4036.32	AS 7	16703	AS 7	1275.38	AS 7	274.354	AS 7	661.647	AS 7	10902.6	AS 7	627.886	AS 7	2.24266e+06		AS 7	504.916	187730	546.29	2260.65	172.614	37.1321	89.5496	1475.59	84.9804	303530		AS 7	504.916	187730	546.29	2260.65	172.614	37.1321	89.5496	1475.59	84.9804	303530		AS 11	2379.54
	AS 8	1.34931e+06	AS 8	16344.2	AS 8	1.42046e+06	AS 8	6784.9	AS 8	13470.2	AS 8	4466.3	AS 8	615.255	AS 8	3729.81	AS 8	4531.66	AS 8	4804.57	AS 8	868894		AS 8	1211.31	105273	502.843	998.301	331.007	45.5978	276.424	335.85	356.077	64395.5		AS 8	1211.31	105273	502.843	998.301	331.007	45.5978	276.424	335.85	356.077	64395.5		AS 12	1676.23
	AS 9	1.37535e+06	AS 9	32623.1	AS 9	555427	AS 9	10012.7	AS 9	11252.4	AS 9	3184.87	AS 9	317.984	AS 9	2069.84	AS 9	11512.6	AS 9	3942.66	AS 9	821918		AS 9	2371.99	40384.5	728.015	818.152	231.568	23.1203	150.495	837.069	286.666	59760.7			2221.52	159382	712.304	1435.88	286.267	67.866	242.918	757.005	352.785	144809			2223.68
	AS 10	1.17949e+06	AS 10	29097.4	AS 10	529815	AS 10	8374.03	AS 10	14128.1	AS 10	2372.41	AS 10	282.105	AS 10	1501.52	AS 10	10281.7	AS 10	4061.07	AS 10	677895		AS 10	2466.95	44919	709.971	1197.81	201.139	23.9176	127.303	871.708	344.308	57473.6			1624.27	37896.7	192.126	488.521	65.8183	32.1158	89.4175	486.197	187.469	115761			367.502
	AS 11	947824	AS 11	22553.8	AS 11	811558	AS 11	10711.1	AS 11	22458.9	AS 11	3125.65	AS 11	962.998	AS 11	2104.64	AS 11	18148.7	AS 11	3843.03	AS 11	904358		AS 11	2379.54	85623.3	1130.07	2369.52	329.771	101.601	222.05	1914.78	405.458	95414.2
	AS 12	1.46052e+06	AS 12	24481.6	AS 12	711473	AS 12	12718.2	AS 12	28046.4	AS 12	3838.04	AS 12	1231.53	AS 12	2869.03	AS 12	37972.6	AS 12	10394.9	AS 12	29449834		AS 12	1676.23	48713.8	870.803	1920.31	262.786	84.3215	196.439	2599.94	711.727	2.0164e+06			IGM	MX2	CD8b1	CD4	IL6a	Tnfa2	IL10	IL1b	GZMA	Muc5b			IGM
	Koi 5	880447	Koi 5	5433.99	Koi 5	2877153	Koi 5	3226.96	Koi 5	15556	Koi 5	3846.43	Koi 5	458.088	Koi 5	3831.16	Koi 5	12002.6	Koi 5	1558.08	Koi 5	332244		Koi 5	617.185	326783	366.514	1766.83	436.873	52.029	435.138	1363.24	176.965	37735.9		Koi 5	617.185	326783	366.514	1766.83	436.873	52.029	435.138	1363.24	176.965	37735.9		Koi 9	398.532
	Koi 6	913863	Koi 6	20210	Koi 6	2280366	Koi 6	4808.52	Koi 6	14416.2	Koi 6	3236.84	Koi 6	651.013	Koi 6	7194.58	Koi 6	137090	Koi 6	2053.92	Koi 6	712016		Koi 6	2211.49	249530	526.176	1577.5	354.193	71.2375	787.271	15001.2	224.751	77912.8		Koi 6	2211.49	249530	526.176	1577.5	354.193	71.2375	787.271	15001.2	224.751	77912.8		Koi 10	385.848
	Koi 7	633824	Koi 7	8600.91	Koi 7	297203	Koi 7	3766.65	Koi 7	10051	Koi 7	1981.94	Koi 7	289.524	Koi 7	1322.61	Koi 7	79921.7	Koi 7	773.896	Koi 7	885412		Koi 7	1356.99	46890.5	594.275	1585.77	312.696	45.679	208.672	12609.5	122.1	139694		Koi 7	1356.99	46890.5	594.275	1585.77	312.696	45.679	208.672	12609.5	122.1	139694		Koi 11	876.009
	Koi 8	1036850	Koi 8	9451.1	Koi 8	3.79925e+06	Koi 8	462.59	Koi 8	16832.3	Koi 8	3843.58	Koi 8	762.61	Koi 8	7771.37	Koi 8	120309	Koi 8	2333.34	Koi 8	443428		Koi 8	911.52	366422	44.6149	1623.4	370.698	73.5507	749.518	11603.3	225.041	42766.8		Koi 8	911.52	366422	44.6149	1623.4	370.698	73.5507	749.518	11603.3	225.041	42766.8		Koi 12	1311.14
	Koi 9	1.00747e+06	Koi 9	4015.11	Koi 9	3140713	Koi 9	2595.48	Koi 9	4700.84	Koi 9	3181	Koi 9	798.131	Koi 9	5199.68	Koi 9	312949	Koi 9	213.155	Koi 9	471016		Koi 9	398.532	311741	257.623	466.597	315.74	79.2211	516.111	31062.7	21.1574	46752.2			1274.3	247407	382.895	1638.38	368.615	60.624	545.15	10144.3	187.214	74527.3			742.882
	Koi 10	717970	Koi 10	2770.27	Koi 10	3.53044e+06	Koi 10	1303.44	Koi 10	3085.02	Koi 10	2306.44	Koi 10	411.767	Koi 10	3838.8	Koi 10	214511	Koi 10	146.293	Koi 10	420919		Koi 10	385.848	491725	181.546	429.686	321.245	57.3515	534.674	29877.4	20.3759	58626.2			694.88	142216	244.889	87.9324	51.6346	13.8681	274.292	6025.01	48.9382	46976.9			442.226
	Koi 11	581766	Koi 11	5096.32	Koi 11	1.04114e+06	Koi 11	265.877	Koi 11	2930.52	Koi 11	1733.74	Koi 11	712.253	Koi 11	3657.21	Koi 11	174453	Koi 11	442.338	Koi 11	180708		Koi 11	876.009	178961	45.7017	503.729	298.013	122.429	628.639	29986.9	76.0336	31061.9
	Koi 12	937801	Koi 12	12295.9	Koi 12	5.20304e+06	Koi 12	10307.9	Koi 12	4270.89	Koi 12	2620.88	Koi 12	981.635	Koi 12	4097.28	Koi 12	182272	Koi 12	498.456	Koi 12	469711		Koi 12	1311.14	554813	1099.16	455.415	279.471	104.674	436.903	19436.1	53.1515	50086.5			IGM	MX2	CD8b1	CD4	IL6a	Tnfa2	IL10	IL1b	GZMA	Muc5b			IGM
	PS 5	1.12606e+06	PS 5	17436.3	PS 5	1650281	PS 5	5446.99	PS 5	11672.4	PS 5	3546.74	PS 5	386.276	PS 5	2687.76	PS 5	11730.9	PS 5	2755.32	PS 5	1.07757e+06		PS 5	1548.44	146554	483.722	1036.57	314.97	34.3034	238.688	1041.77	244.688	95694.2		PS 5	1548.44	146554	483.722	1036.57	314.97	34.3034	238.688	1041.77	244.688	95694.2		PS 9	1916.3
	PS 6	1.10738e+06	PS 6	18014.1	PS 6	1.72379e+06	PS 6	5040.71	PS 6	12510.1	PS 6	3855.32	PS 6	415.246	PS 6	2914.07	PS 6	11086.6	PS 6	3138.43	PS 6	1.02285e+06		PS 6	1626.73	155663	455.191	1129.7	348.147	37.498	263.15	1001.16	283.41	92366.7		PS 6	1626.73	155663	455.191	1129.7	348.147	37.498	263.15	1001.16	283.41	92366.7		PS 10	405.081
	PS 7	1.11168e+06	PS 7	41158.7	PS 7	2.01139e+06	PS 7	6484.89	PS 7	7447.32	PS 7	2882.22	PS 7	468.311	PS 7	2760.11	PS 7	3083.03	PS 7	3515.71	PS 7	665723		PS 7	3702.4	180933	583.343	669.919	259.268	42.1266	248.284	277.332	316.253	59884.7		PS 7	3702.4	180933	583.343	669.919	259.268	42.1266	248.284	277.332	316.253	59884.7		PS 11	559.147
	PS 8	1.32344e+06	PS 8	93335.3	PS 8	1.43984e+06	PS 8	7521.6	PS 8	9896.47	PS 8	4934.34	PS 8	525.382	PS 8	3468.45	PS 8	3791.2	PS 8	5599.36	PS 8	1.25778e+06		PS 8	7052.48	108795	568.337	747.784	372.842	39.6982	262.078	286.466	423.092	95038.5		PS 8	7052.48	108795	568.337	747.784	372.842	39.6982	262.078	286.466	423.092	95038.5		PS 12	912.742
	PS 9	1.25586e+06	PS 9	24065.9	PS 9	753764	PS 9	8796.99	PS 9	11893.7	PS 9	2791.09	PS 9	175.207	PS 9	1628.94	PS 9	2394.18	PS 9	6472.74	PS 9	872374		PS 9	1916.3	60020	700.478	947.059	222.246	13.9512	129.708	190.641	515.405	69464.5			3482.51	147986	522.649	895.994	323.807	38.4066	253.05	651.681	316.861	85746			948.317
	PS 10	984532	PS 10	3988.15	PS 10	885361	PS 10	4334.74	PS 10	7794.92	PS 10	1984.38	PS 10	314.693	PS 10	1060.89	PS 10	2246	PS 10	2965.65	PS 10	468349		PS 10	405.081	89927.1	440.285	791.739	201.556	31.9638	107.756	228.129	301.224	47570.7			2580.54	29902.1	62.8145	221.704	49.1264	3.32506	11.7261	427.326	76.6229	17300.9			679.415
	PS 11	966785	PS 11	5405.75	PS 11	585128	PS 11	6174.02	PS 11	7117.28	PS 11	3206.4	PS 11	178.9	PS 11	885.497	PS 11	2053.67	PS 11	4426.16	PS 11	791216		PS 11	559.147	60523	638.614	736.18	331.656	18.5046	91.592	212.423	457.822	81839.9
	PS 12	790757	PS 12	7217.57	PS 12	486995	PS 12	12436.5	PS 12	20956.9	PS 12	1051.5	PS 12	149.997	PS 12	644.654	PS 12	1643.81	PS 12	3735.57	PS 12	2.07035e+06		PS 12	912.742	61585.9	1572.73	2650.24	132.974	18.9688	81.5236	207.878	472.404	261819			IGM	MX2	CD8b1	CD4	IL6a	Tnfa2	IL10	IL1b	GZMA	Muc5b			IGM
	Rop 5	984593	Rop 5	10183.3	Rop 5	1.35775e+06	Rop 5	8554.65	Rop 5	9779.77	Rop 5	3906.3	Rop 5	298.375	Rop 5	1488.65	Rop 5	4682.67	Rop 5	2790.1	Rop 5	471558		Rop 5	1034.27	137899	868.851	993.281	396.743	30.3044	151.195	475.594	283.376	47893.7		Rop 5	1034.27	137899	868.851	993.281	396.743	30.3044	151.195	475.594	283.376	47893.7		Rop 9	436.633
	Rop 6	1.19034e+06	Rop 6	26153.5	Rop 6	2492720	Rop 6	8992.65	Rop 6	8548.09	Rop 6	6222.21	Rop 6	1549.16	Rop 6	4504.65	Rop 6	17911.9	Rop 6	4173.82	Rop 6	910024		Rop 6	2197.14	209412	755.468	718.12	522.725	130.144	378.433	1504.77	350.64	76450.7		Rop 6	2197.14	209412	755.468	718.12	522.725	130.144	378.433	1504.77	350.64	76450.7		Rop 10	862.996
	Rop 7	1.44428e+06	Rop 7	28182.1	Rop 7	2390940	Rop 7	9396.54	Rop 7	13247.9	Rop 7	6076.85	Rop 7	365.487	Rop 7	2922.71	Rop 7	2976.21	Rop 7	5607.01	Rop 7	838235		Rop 7	1951.29	165545	650.604	917.267	420.753	25.3058	202.365	206.069	388.222	58038.2		Rop 7	1951.29	165545	650.604	917.267	420.753	25.3058	202.365	206.069	388.222	58038.2		Rop 11	3083.49
	Rop 8	1.19705e+06	Rop 8	8409.12	Rop 8	3.89095e+06	Rop 8	7780.53	Rop 8	8547.07	Rop 8	5690.76	Rop 8	679.465	Rop 8	2509.83	Rop 8	9880.14	Rop 8	2696.29	Rop 8	786107		Rop 8	702.486	325044	649.975	714.01	475.398	56.7616	209.667	825.373	225.244	65670.3		Rop 8	702.486	325044	649.975	714.01	475.398	56.7616	209.667	825.373	225.244	65670.3		Rop 12	451.703
	Rop 9	1.66116e+06	Rop 9	7253.17	Rop 9	476889	Rop 9	11487.1	Rop 9	13125.7	Rop 9	8108.26	Rop 9	799.232	Rop 9	3261.09	Rop 9	9154.14	Rop 9	5355.6	Rop 9	615884		Rop 9	436.633	28708.2	691.509	790.152	488.109	48.1129	196.314	551.069	322.401	37075.5			1471.3	209475	731.224	835.669	453.905	60.629	235.415	752.951	311.871	62013.2			1208.7
	Rop 10	1.29574e+06	Rop 10	11182.2	Rop 10	333176	Rop 10	14426.1	Rop 10	21756.9	Rop 10	3806.57	Rop 10	540.3	Rop 10	2903.92	Rop 10	10101.5	Rop 10	5584.8	Rop 10	864564		Rop 10	862.996	25713.2	1113.35	1679.11	293.776	41.6983	224.113	779.597	431.013	66723.6			716.311	82480.7	104.291	141.561	56.4643	48.355	98.8305	561.688	72.2235	12068.9			1265.37
	Rop 11	1.33747e+06	Rop 11	41240.7	Rop 11	1.57231e+06	Rop 11	15822	Rop 11	14017.4	Rop 11	3301.43	Rop 11	368.537	Rop 11	1652.54	Rop 11	6631.62	Rop 11	5918.07	Rop 11	577741		Rop 11	3083.49	117559	1182.98	1048.06	246.842	27.5548	123.557	495.833	442.482	43196.5
	Rop 12	935772	Rop 12	4226.91	Rop 12	388264	Rop 12	11326.2	Rop 12	12553.4	Rop 12	3110.55	Rop 12	485.857	Rop 12	1709.92	Rop 12	5117.22	Rop 12	4282.53	Rop 12	1.07642e+06		Rop 12	451.703	41491.3	1210.36	1341.5	332.405	51.9205	182.728	546.845	457.647	115030			IGM	MX2	CD8b1	CD4	IL6a	Tnfa2	IL10	IL1b	GZMA	Muc5b			IGM
	Ctrl. Rop 1	1.25282e+06	Ctrl. Rop 1	14914.9	Ctrl. Rop 1	34829.3	Ctrl. Rop 1	10766.2	Ctrl. Rop 1	10556	Ctrl. Rop 1	1313.76	Ctrl. Rop 1	158.138	Ctrl. Rop 1	1246.12	Ctrl. Rop 1	9175.06	Ctrl. Rop 1	1964.8	Ctrl. Rop 1	516167		Ctrl. Rop 1	1190.5	2780.06	859.353	842.58	104.864	12.6226	99.4649	732.35	156.83	41200.3		Ctrl. Rop 1	1190.5	2780.06	859.353	842.58	104.864	12.6226	99.4649	732.35	156.83	41200.3		Ctrl. Koi 2	300.13
	Ctrl. Rop 2	908396	Ctrl. Rop 2	8793.08	Ctrl. Rop 2	35559.8	Ctrl. Rop 2	12575.2	Ctrl. Rop 2	16638.4	Ctrl. Rop 2	4218.68	Ctrl. Rop 2	109.958	Ctrl. Rop 2	2381.06	Ctrl. Rop 2	13096.9	Ctrl. Rop 2	4291.65	Ctrl. Rop 2	584796		Ctrl. Rop 2	967.979	3914.57	1384.33	1831.63	464.41	12.1046	262.117	1441.76	472.442	64376.7		Ctrl. Rop 2	967.979	3914.57	1384.33	1831.63	464.41	12.1046	262.117	1441.76	472.442	64376.7		Ctrl. Koi 3	1598.39
	Ctrl. Rop 3	1.04587e+06	Ctrl. Rop 3	2097.06	Ctrl. Rop 3	149860	Ctrl. Rop 3	6898.13	Ctrl. Rop 3	11106	Ctrl. Rop 3	1264.38	Ctrl. Rop 3	90.2566	Ctrl. Rop 3	790.758	Ctrl. Rop 3	3576.71	Ctrl. Rop 3	1688.08	Ctrl. Rop 3	458173		Ctrl. Rop 3	200.509	14328.7	659.559	1061.89	120.892	8.62981	75.6078	341.984	161.404	43807.9		Ctrl. Rop 3	200.509	14328.7	659.559	1061.89	120.892	8.62981	75.6078	341.984	161.404	43807.9		Ctrl. Koi 4	457.307
	Ctrl. Rop 4	1.67954e+06	Ctrl. Rop 4	4938.75	Ctrl. Rop 4	39516	Ctrl. Rop 4	10435.5	Ctrl. Rop 4	21024.7	Ctrl. Rop 4	2275.94	Ctrl. Rop 4	242.945	Ctrl. Rop 4	1553.78	Ctrl. Rop 4	8529.5	Ctrl. Rop 4	5489.84	Ctrl. Rop 4	276761		Ctrl. Rop 4	294.053	2352.78	621.327	1251.81	135.509	14.4649	92.5118	507.846	326.865	16478.3		Ctrl. Rop 4	294.053	2352.78	621.327	1251.81	135.509	14.4649	92.5118	507.846	326.865	16478.3		Ctrl. Koi 1	3349.69
	Ctrl. Koi 2	1.25691e+06	Ctrl. Koi 2	3772.37	Ctrl. Koi 2	48388.2	Ctrl. Koi 2	639.051	Ctrl. Koi 2	46696.4	Ctrl. Koi 2	1861.24	Ctrl. Koi 2	277.724	Ctrl. Koi 2	6689.88	Ctrl. Koi 2	6911.06	Ctrl. Koi 2	5521.72	Ctrl. Koi 2	1.29209e+06		Ctrl. Koi 2	300.13	3849.77	50.8429	3715.17	148.08	22.0957	532.247	549.844	439.308	102799			663.261	5844.04	881.142	1246.98	206.419	11.9555	132.425	755.984	279.385	41465.8			1426.38
	Ctrl. Koi 3	969306	Ctrl. Koi 3	15493.3	Ctrl. Koi 3	66993.6	Ctrl. Koi 3	4325.63	Ctrl. Koi 3	38013.4	Ctrl. Koi 3	1584.2	Ctrl. Koi 3	259.085	Ctrl. Koi 3	4695.64	Ctrl. Koi 3	6894.48	Ctrl. Koi 3	11665.7	Ctrl. Koi 3	887667		Ctrl. Koi 3	1598.39	6911.5	446.261	3921.72	163.436	26.729	484.433	711.28	1203.51	91577.6			490.336	5694.73	351.319	424.12	172.449	2.43753	87.0394	484.359	151.068	19620.1			1406.68
	Ctrl. Koi 4	1.13305e+06	Ctrl. Koi 4	5181.53	Ctrl. Koi 4	43699.4	Ctrl. Koi 4	3729.46	Ctrl. Koi 4	33111.9	Ctrl. Koi 4	1309.59	Ctrl. Koi 4	217.97	Ctrl. Koi 4	2720.35	Ctrl. Koi 4	9600.31	Ctrl. Koi 4	3772.47	Ctrl. Koi 4	557109		Ctrl. Koi 4	457.307	3856.79	329.152	2922.37	115.581	19.2375	240.091	847.297	332.947	49168.9
	Ctrl. Koi 1	856531	Ctrl. Koi 1	28691.1	Ctrl. Koi 1	85323.4	Ctrl. Koi 1	9517.05	Ctrl. Koi 1	36001	Ctrl. Koi 1	942.899	Ctrl. Koi 1	280.574	Ctrl. Koi 1	3369.94	Ctrl. Koi 1	5825.71	Ctrl. Koi 1	4640.14	Ctrl. Koi 1	257086		Ctrl. Koi 1	3349.69	9961.5	1111.12	4203.11	110.083	32.757	393.441	680.152	541.736	30014.8			IGM	MX2	CD8b1	CD4	IL6a	Tnfa2	IL10	IL1b	GZMA	Muc5b			IGM
	Contr. AS 1	884231	Contr. AS 1	19854.9	Contr. AS 1	42403.6	Contr. AS 1	27101.5	Contr. AS 1	11759.1	Contr. AS 1	2486.48	Contr. AS 1	158.138	Contr. AS 1	1582.32	Contr. AS 1	5566.03	Contr. AS 1	5959.52	Contr. AS 1	432737		Contr. AS 1	2245.44	4795.53	3064.98	1329.86	281.203	17.8843	178.948	629.477	673.978	48939.3		Contr. AS 1	2245.44	4795.53	3064.98	1329.86	281.203	17.8843	178.948	629.477	673.978	48939.3		Contr. PS 2	1331.85
	Contr. AS 2	749007	Contr. AS 2	45393.9	Contr. AS 2	33351	Contr. AS 2	26582	Contr. AS 2	12972.6	Contr. AS 2	3039.9	Contr. AS 2	109.958	Contr. AS 2	2925.76	Contr. AS 2	10042.4	Contr. AS 2	8046.47	Contr. AS 2	525963		Contr. AS 2	6060.54	4452.7	3548.96	1731.97	405.857	14.6804	390.619	1340.76	1074.28	70221.4		Contr. AS 2	6060.54	4452.7	3548.96	1731.97	405.857	14.6804	390.619	1340.76	1074.28	70221.4		Contr. PS 3	1482.99
	Contr. AS 3	1.0369e+06	Contr. AS 3	13571.7	Contr. AS 3	66717.1	Contr. AS 3	32879.2	Contr. AS 3	14095.5	Contr. AS 3	2095.39	Contr. AS 3	90.2566	Contr. AS 3	1417.8	Contr. AS 3	5136	Contr. AS 3	12232.6	Contr. AS 3	623319		Contr. AS 3	1308.87	6434.27	3170.91	1359.38	202.082	8.70443	136.734	495.321	1179.72	60113.5		Contr. AS 3	1308.87	6434.27	3170.91	1359.38	202.082	8.70443	136.734	495.321	1179.72	60113.5		Contr. PS 4	478.13
	Contr. AS 4	943660	Contr. AS 4	701.136	Contr. AS 4	221903	Contr. AS 4	29575.2	Contr. AS 4	9884.01	Contr. AS 4	2788.61	Contr. AS 4	242.945	Contr. AS 4	816.824	Contr. AS 4	5861.83	Contr. AS 4	665.709	Contr. AS 4	288304		Contr. AS 4	74.2996	23515.1	3134.1	1047.41	295.51	25.745	86.5591	621.18	70.5454	30551.6		Contr. AS 4	74.2996	23515.1	3134.1	1047.41	295.51	25.745	86.5591	621.18	70.5454	30551.6		Contr. PS1	253.523
	Contr. PS 2	923481	Contr. PS 2	12299.3	Contr. PS 2	39732.5	Contr. PS 2	15511.3	Contr. PS 2	5428.47	Contr. PS 2	3538.48	Contr. PS 2	277.724	Contr. PS 2	649.866	Contr. PS 2	5092.79	Contr. PS 2	4557.14	Contr. PS 2	548511		Contr. PS 2	1331.85	4302.47	1679.65	587.827	383.168	30.0736	70.3713	551.478	493.474	59396			2422.29	9799.4	3229.74	1367.16	296.163	16.7535	198.215	771.686	749.633	52456.5			886.621
	Contr. PS 3	1.05633e+06	Contr. PS 3	15665.3	Contr. PS 3	31243.9	Contr. PS 3	24331.1	Contr. PS 3	20745.7	Contr. PS 3	4555.92	Contr. PS 3	259.085	Contr. PS 3	563.956	Contr. PS 3	3824.78	Contr. PS 3	3519.43	Contr. PS 3	708377		Contr. PS 3	1482.99	2957.76	2303.36	1963.93	431.295	24.5268	53.388	362.081	333.174	67059.9			2583.34	9184.61	217.297	280.935	83.8814	7.09955	133.713	384.319	502.414	16994.3			611.434
	Contr. PS 4	1189428	Contr. PS 4	5687.01	Contr. PS 4	44310.3	Contr. PS 4	12462.1	Contr. PS 4	7686.05	Contr. PS 4	4132.93	Contr. PS 4	217.97	Contr. PS 4	1248.06	Contr. PS 4	6669.77	Contr. PS 4	1846.27	Contr. PS 4	484333		Contr. PS 4	478.13	3725.34	1047.74	646.198	347.472	18.3257	104.929	560.755	155.224	40719.8
	Contr. PS1	912744	Contr. PS1	2314.02	Contr. PS1	25860.9	Contr. PS1	7853.63	Contr. PS1	5542.47	Contr. PS1	2020.71	Contr. PS1	280.574	Contr. PS1	645.428	Contr. PS1	5960.14	Contr. PS1	2519.24	Contr. PS1	623446		Contr. PS1	253.523	2833.31	860.442	607.231	221.388	30.7396	70.7129	652.991	276.007	68304.5
																													IGM Mean
																														Ctr	6d	11d
																													AS	2422.29	2221.52	2223.68
		IGM	MX2	CD8b1	CD4	IL6a	Tnfa2	IL10	IL1b	GZMA				IGM	MX2	CD8b1	CD4	IL6a	Tnfa2	IL10	IL1b	GZMA	muc5b						Koi	1426.38	1274.3	742.882
	AS 5	3923.85	201258	846.546	1305.29	324.918	119.672	294.068	930.452	615.165		as	cev6d	3.59371	5.30375	2.92765	3.11571	2.51177	2.07799	2.46845	2.96869	2.78899	4.72692						PS	886.621	3482.51	948.317
	AS 6	3246.02	143269	953.537	1179.29	316.529	69.0625	311.628	286.126	354.919		as	cev6d	3.51135	5.15615	2.97934	3.07162	2.50041	1.83924	2.49364	2.45656	2.55013	5.19863							Rop	663.261	663.261	1208.7
	AS 7	504.916	187730	546.29	2260.65	172.614	37.1321	89.5496	1475.59	84.9804		as	cev6d	2.70322	5.27353	2.73742	3.35423	2.23708	1.56975	1.95206	3.16897	1.92932	5.4822
	AS 8	1211.31	105273	502.843	998.301	331.007	45.5978	276.424	335.85	356.077		as	cev6d	3.08325	5.02232	2.70143	2.99926	2.51984	1.65894	2.44158	2.52615	2.55154	4.80886							IGM Sd
	AS 9	2371.99	40384.5	728.015	818.152	231.568	23.1203	150.495	837.069	286.666		as	cev11d	3.37511	4.60621	2.86214	2.91283	2.36468	1.36399	2.17752	2.92276	2.45738	4.77642							AS	2583.34	1624.27	367.502
	AS 10	2466.95	44919	709.971	1197.81	201.139	23.9176	127.303	871.708	344.308		as	cev11d	3.39216	4.65243	2.85124	3.07839	2.3035	1.37872	2.10484	2.94037	2.53695	4.75947							Koi	1406.68	694.88	442.226
	AS 11	2379.54	85623.3	1130.07	2369.52	329.771	101.601	222.05	1914.78	405.458		as	cev11d	3.37649	4.93259	3.05311	3.37466	2.51821	2.0069	2.34645	3.28212	2.60795	4.97961							PS	611.434	2580.54	679.415
	AS 12	1676.23	48713.8	870.803	1920.31	262.786	84.3215	196.439	2599.94	711.727		as	cev11d	3.22433	4.68765	2.93992	3.28337	2.4196	1.92594	2.29323	3.41496	2.85231	6.30458							Rop	490.336	716.311	1265.37
	Koi 5	617.185	326783	366.514	1766.83	436.873	52.029	435.138	1363.24	176.965		koi	cev6d	2.79042	5.51426	2.56409	3.24719	2.64035	1.71625	2.63863	3.13457	2.24789	4.57675
	Koi 6	2211.49	249530	526.176	1577.5	354.193	71.2375	787.271	15001.2	224.751		koi	cev6d	3.34469	5.39712	2.72113	3.19797	2.54924	1.85271	2.89612	4.17613	2.3517	4.89161
	Koi 7	1356.99	46890.5	594.275	1585.77	312.696	45.679	208.672	12609.5	122.1		koi	cev6d	3.13258	4.67108	2.77399	3.20024	2.49512	1.65972	2.31946	4.1007	2.08671	5.14518
	Koi 8	911.52	366422	44.6149	1623.4	370.698	73.5507	749.518	11603.3	225.041		koi	cev6d	2.95977	5.56398	1.64948	3.21043	2.56902	1.86659	2.87478	4.06458	2.35226	4.63111
	Koi 9	398.532	311741	257.623	466.597	315.74	79.2211	516.111	31062.7	21.1574		koi	cev11d	2.60046	5.49379	2.41098	2.66894	2.49933	1.89884	2.71274	4.49224	1.32546	4.6698
	Koi 10	385.848	491725	181.546	429.686	321.245	57.3515	534.674	29877.4	20.3759		koi	cev11d	2.58642	5.69172	2.25899	2.63315	2.50684	1.75854	2.72809	4.47534	1.30912	4.76809
	Koi 11	876.009	178961	45.7017	503.729	298.013	122.429	628.639	29986.9	76.0336		koi	cev11d	2.94251	5.25276	1.65993	2.7022	2.47424	2.08789	2.7984	4.47693	1.88101	4.49223
	Koi 12	1311.14	554813	1099.16	455.415	279.471	104.674	436.903	19436.1	53.1515		koi	cev11d	3.11765	5.74415	3.04106	2.65841	2.44634	2.01984	2.64039	4.28861	1.72552	4.69972							MX2 Mean
	PS 5	1548.44	146554	483.722	1036.57	314.97	34.3034	238.688	1041.77	244.688		ps	cev6d	3.18989	5.166	2.6846	3.0156	2.49827	1.53534	2.37783	3.01777	2.38861	4.98089								Ctr	6d	11d
	PS 6	1626.73	155663	455.191	1129.7	348.147	37.498	263.15	1001.16	283.41		ps	cev6d	3.21131	5.19219	2.65819	3.05296	2.54176	1.57401	2.4202	3.0005	2.45242	4.96552							AS	9799.4	159382	54910.2
	PS 7	3702.4	180933	583.343	669.919	259.268	42.1266	248.284	277.332	316.253		ps	cev6d	3.56848	5.25752	2.76592	2.82602	2.41375	1.62456	2.39495	2.443	2.50004	4.77732							Koi	6144.89	247407	384310
	PS 8	7052.48	108795	568.337	747.784	372.842	39.6982	262.078	286.466	423.092		ps	cev6d	3.84834	5.03661	2.75461	2.87378	2.57152	1.59877	2.41843	2.45707	2.62643	4.9779							PS	3454.72	147986	68014
	PS 9	1916.3	60020	700.478	947.059	222.246	13.9512	129.708	190.641	515.405		ps	cev11d	3.28246	4.7783	2.84539	2.97638	2.34683	1.14461	2.11297	2.28022	2.71215	4.84176							Rop	5844.04	209475	53367.8
	PS 10	405.081	89927.1	440.285	791.739	201.556	31.9638	107.756	228.129	301.224		ps	cev11d	2.60754	4.95389	2.64373	2.89858	2.30439	1.50466	2.03244	2.35818	2.47889	4.67734
	PS 11	559.147	60523	638.614	736.18	331.656	18.5046	91.592	212.423	457.822		ps	cev11d	2.74753	4.78192	2.80524	2.86698	2.52069	1.26728	1.96186	2.3272	2.6607	4.91297							MX2 Sd
	PS 12	912.742	61585.9	1572.73	2650.24	132.974	18.9688	81.5236	207.878	472.404		ps	cev11d	2.96035	4.78948	3.19665	3.42328	2.12377	1.27804	1.91128	2.31781	2.67431	5.418
	Rop 5	1034.27	137899	868.851	993.281	396.743	30.3044	151.195	475.594	283.376		rop	cev6d	3.01463	5.13956	2.93895	2.99707	2.59851	1.48151	2.17954	2.67724	2.45236	4.68028							AS	9184.61	37896.7	20756.6
	Rop 6	2197.14	209412	755.468	718.12	522.725	130.144	378.433	1504.77	350.64		rop	cev6d	3.34186	5.321	2.87822	2.8562	2.71827	2.11442	2.57799	3.17747	2.54486	4.88338							Koi	2924.45	142216	171312
	Rop 7	1951.29	165545	650.604	917.267	420.753	25.3058	202.365	206.069	388.222		rop	cev6d	3.29032	5.21892	2.81332	2.9625	2.62403	1.40322	2.30613	2.31401	2.58908	4.76371							PS	689.212	29902.1	14623.3
	Rop 8	702.486	325044	649.975	714.01	475.398	56.7616	209.667	825.373	225.244		rop	cev6d	2.84664	5.51194	2.8129	2.8537	2.67706	1.75405	2.32153	2.91665	2.35265	4.81737							Rop	5694.73	82480.7	43337.4
	Rop 9	436.633	28708.2	691.509	790.152	488.109	48.1129	196.314	551.069	322.401		rop	cev11d	2.64012	4.45801	2.8398	2.89771	2.68852	1.68226	2.29295	2.74121	2.5084	4.56909
	Rop 10	862.996	25713.2	1113.35	1679.11	293.776	41.6983	224.113	779.597	431.013		rop	cev11d	2.93601	4.41016	3.04663	3.22508	2.46802	1.62012	2.35047	2.89187	2.63449	4.82428
	Rop 11	3083.49	117559	1182.98	1048.06	246.842	27.5548	123.557	495.833	442.482		rop	cev11d	3.48904	5.07025	3.07298	3.02038	2.39242	1.4402	2.09187	2.69534	2.6459	4.63545
	Rop 12	451.703	41491.3	1210.36	1341.5	332.405	51.9205	182.728	546.845	457.647		rop	cev11d	2.65485	4.61796	3.08291	3.12759	2.52167	1.71534	2.2618	2.73786	2.66053	5.06081
	Ctrl. Rop 1	1190.5	2780.06	859.353	842.58	104.864	12.6226	99.4649	732.35	156.83		as	ctr	3.07573	3.44405	2.93417	2.92561	2.02063	1.10115	1.99767	2.86472	2.19543	4.6149							CD8b1 Mean
	Ctrl. Rop 2	967.979	3914.57	1384.33	1831.63	464.41	12.1046	262.117	1441.76	472.442		as	ctr	2.98587	3.59268	3.14124	3.26284	2.6669	1.08295	2.41849	3.15889	2.67435	4.80873								Ctr	6d	11d
	Ctrl. Rop 3	200.509	14328.7	659.559	1061.89	120.892	8.62981	75.6078	341.984	161.404		as	ctr	2.30213	4.15621	2.81925	3.02608	2.0824	0.936001	1.87857	2.53401	2.20791	4.64155							AS	3229.74	712.304	859.715
	Ctrl. Rop 4	294.053	2352.78	621.327	1251.81	135.509	14.4649	92.5118	507.846	326.865		as	ctr	2.46843	3.37158	2.79332	3.09754	2.13197	1.16032	1.9662	2.70573	2.51437	4.21691							Koi	484.343	382.895	396.007
	Ctrl. Koi 2	300.13	3849.77	50.8429	3715.17	148.08	22.0957	532.247	549.844	439.308		ps	ctr	2.47731	3.58543	1.70623	3.56998	2.1705	1.34431	2.72611	2.74024	2.64277	5.01199							PS	1472.8	522.649	838.026
	Ctrl. Koi 3	1598.39	6911.5	446.261	3921.72	163.436	26.729	484.433	711.28	1203.51		ps	ctr	3.20368	3.83957	2.64959	3.59348	2.21335	1.42698	2.68523	2.85204	3.08045	4.96179							Rop	881.142	731.224	1049.55
	Ctrl. Koi 4	457.307	3856.79	329.152	2922.37	115.581	19.2375	240.091	847.297	332.947		ps	ctr	2.66021	3.58623	2.5174	3.46573	2.06289	1.28415	2.38038	2.92804	2.52238	4.69169
	Ctrl. Koi 1	3349.69	9961.5	1111.12	4203.11	110.083	32.757	393.441	680.152	541.736		ps	ctr	3.525	3.99832	3.04576	3.62357	2.04172	1.5153	2.59488	2.83261	2.73379	4.47734							CD8b1 Sd
	Contr. AS 1	2245.44	4795.53	3064.98	1329.86	281.203	17.8843	178.948	629.477	673.978		rop	ctr	3.3513	3.68084	3.48643	3.12381	2.44902	1.25247	2.25273	2.79898	2.82865	4.68966
	Contr. AS 2	6060.54	4452.7	3548.96	1731.97	405.857	14.6804	390.619	1340.76	1074.28		rop	ctr	3.78251	3.64862	3.5501	3.23854	2.60837	1.16674	2.59175	3.12735	3.03112	4.84647							AS	217.297	192.126	194.065
	Contr. AS 3	1308.87	6434.27	3170.91	1359.38	202.082	8.70443	136.734	495.321	1179.72		rop	ctr	3.1169	3.8085	3.50118	3.13334	2.30553	0.939741	2.13588	2.69489	3.07178	4.77897							Koi	449.556	244.889	476.893
	Contr. AS 4	74.2996	23515.1	3134.1	1047.41	295.51	25.745	86.5591	621.18	70.5454		rop	ctr	1.87099	4.37135	3.49611	3.02012	2.47057	1.41069	1.93731	2.79322	1.84847	4.48503							PS	655.303	62.8145	502.219
	Contr. PS 2	1331.85	4302.47	1679.65	587.827	383.168	30.0736	70.3713	551.478	493.474		koi	ctr	3.12445	3.63372	3.22522	2.76925	2.58339	1.47819	1.8474	2.74153	2.69326	4.77376							Rop	351.319	104.291	242.16
	Contr. PS 3	1482.99	2957.76	2303.36	1963.93	431.295	24.5268	53.388	362.081	333.174		koi	ctr	3.17114	3.47096	3.36236	3.29313	2.63477	1.38964	1.72744	2.55881	2.52267	4.82646
	Contr. PS 4	478.13	3725.34	1047.74	646.198	347.472	18.3257	104.929	560.755	155.224		koi	ctr	2.67955	3.57117	3.02025	2.81037	2.54092	1.26306	2.0209	2.74877	2.19096	4.60981
	Contr. PS1	253.523	2833.31	860.442	607.231	221.388	30.7396	70.7129	652.991	276.007		koi	ctr	2.40402	3.45229	2.93472	2.78335	2.34515	1.4877	1.8495	2.81491	2.44092	4.83445
																													CD4 Mean
																														Ctr	6d	11d
																													AS	1367.16	1435.88	1576.45
																													Koi	3690.59	1638.38	463.857
																													PS	951.297	895.994	1281.3
																													Rop	1246.98	835.669	1214.71
																													CD4 Sd
																													AS	280.935	488.521	698.948
																													Koi	549.808	87.9324	30.7472
																													PS	675.527	221.704	916.976
																													Rop	424.12	141.561	382.871
																													IL6a Mean
																														Ctr	6d	11d
																													AS	296.163	286.267	256.316
																													Koi	134.295	368.615	303.617
																													PS	345.831	323.807	222.108
																													Rop	206.419	453.905	340.283
																													IL6a Sd
																													AS	83.8814	65.8183	55.0589
																													Koi	25.6623	51.6346	18.9046
																													PS	89.7901	49.1264	82.3978
																													Rop	172.449	56.4643	104.576
																													Tnfa2 Mean
																														Ctr	6d	11d
																													AS	16.7535	67.866	58.2401
																													Koi	25.2048	60.624	90.919
																													PS	25.9164	38.4066	20.8471
																													Rop	11.9555	60.629	42.3216
																													Tnfa2 Sd
																													AS	7.09955	32.1158	40.7097
																													Koi	5.90576	13.8681	28.5525
																													PS	5.77627	3.32506	7.74916
																													Rop	2.43753	48.355	10.7102
																													IL10 Mean
																														Ctr	6d	11d
																													AS	198.215	242.918	174.072
																													Koi	412.553	545.15	529.082
																													PS	74.8504	253.05	102.645
																													Rop	132.425	235.415	181.678
																													IL10 Sd
																													AS	133.713	89.4175	42.9939
																													Koi	128.585	274.292	78.7571
																													PS	21.6222	11.7261	21.0301
																													Rop	87.0394	98.8305	42.4032
																													IL1b Mean
																														Ctr	6d	11d
																													AS	771.686	757.005	1555.88
																													Koi	697.143	10144.3	27590.8
																													PS	531.826	651.681	209.768
																													Rop	755.984	752.951	593.336
																													IL1b Sd
																													AS	384.319	486.197	857.061
																													Koi	122.109	6025.01	5462.68
																													PS	122.09	427.326	15.4225
																													Rop	484.359	561.688	126.686
																													GZMA Mean
																														Ctr	6d	11d
																													AS	749.633	352.785	437.04
																													Koi	629.375	187.214	42.6796
																													PS	314.47	316.861	436.714
																													Rop	279.385	311.871	413.386
																													GZMA Sd
																													AS	502.414	187.469	189.439
																													Koi	392.133	48.9382	26.9741
																													PS	140.512	76.6229	93.5756
																													Rop	151.068	72.2235	61.6293
																															Mucb5 Mean
																														Ctr	6d	11d
																													AS	52456.5	144809	557262
																													Koi	68390	74527.3	46631.7
																													PS	58870.1	85746	115174
																													Rop	41465.8	62013.2	65506.5
																													Mucb5 sd
																													AS	16994.3	115761	972913
																													Koi	34466.1	46976.9	11521.5
																													PS	12725.2	17300.9	98785.1
																													Rop	19620.1	12068.9	35403.1
[truncated: 9 more columns]

## Sheet: Genogroup I
	40S			40S			IGM			IGM			MX2			MX2			CD8b1			CD8b1			CD4			CD4			IL6a			IL6a			Tnfa2			Tnfa2			IL10			IL10
	Cohabiation II			Cohabiation IV			Cohabiation II			Cohabiation IV			Cohabiation II			Cohabiation IV			Cohabiation II			Cohabiation IV			Cohabiation II			Cohabiation IV			Cohabiation II			Cohabiation IV			Cohabiation II			Cohabiation IV			Cohabiation II			Cohabiation IV
	Sample Name	Quantity Mean		Sample Name	Quantity Mean		Sample Name	Quantity Mean		Sample Name	Quantity Mean		Sample Name	Quantity Mean		Sample Name	Quantity Mean		Sample Name	Quantity Mean		Sample Name	Quantity Mean		Sample Name	Quantity Mean		Sample Name	Quantity Mean		Sample Name	Quantity Mean		Sample Name	Quantity Mean		Sample Name	Quantity Mean		Sample Name	Quantity Mean		Sample Name	Quantity Mean		Sample Name	Quantity Mean
	AS 1	1.87167e+06		AS 5	1.01131e+06		AS 1	3951.17		AS 5	39682.4		AS 1	12736393		AS 5	2035348		AS 1	10827.8		AS 5	8561.24		AS 1	4545.35		AS 5	13200.6		AS 1	6293.21		AS 5	3285.94		AS 1	1210.25		AS 5	1210.25		AS 1	1719.26		AS 5	2973.95
	AS 2	777564		AS 6	996172		AS 2	419.041		AS 6	32335.9		AS 2	236064		AS 6	1.4272e+06		AS 2	5477.3		AS 6	9498.87		AS 2	575.596		AS 6	11747.7		AS 2	5306.73		AS 6	3153.17		AS 2	687.981		AS 6	687.981		AS 2	529.607		AS 6	3104.35
	AS 3	1.40649e+06		AS 7	738861		AS 3	551.194		AS 7	3730.63		AS 3	209941		AS 7	1.38707e+06		AS 3	9056.03		AS 7	4036.32		AS 3	1772.28		AS 7	16703		AS 3	6636.95		AS 7	1275.38		AS 3	274.354		AS 7	274.354		AS 3	1692.21		AS 7	661.647
	AS 4	1.33258e+06		AS 8	1.34931e+06		AS 4	3086.33		AS 8	16344.2		AS 4	523625		AS 8	1.42046e+06		AS 4	9476.23		AS 8	6784.9		AS 4	6881.21		AS 8	13470.2		AS 4	5552.95		AS 8	4466.3		AS 4	615.255		AS 8	615.255		AS 4	1640.56		AS 8	3729.81
	AS 5	1.58477e+06		AS 9	1.37535e+06		AS 5	7088.34		AS 9	32623.1		AS 5	353035		AS 9	555427		AS 5	18857.1		AS 9	10012.7		AS 5	8928.39		AS 9	11252.4		AS 5	8306.6		AS 9	3184.87		AS 5	317.984		AS 9	317.984		AS 5	1450.11		AS 9	2069.84
	AS 6	1.14246e+06		AS 10	1.17949e+06		AS 6	14102		AS 10	29097.4		AS 6	528289		AS 10	529815		AS 6	7152.64		AS 10	8374.03		AS 6	2086.94		AS 10	14128.1		AS 6	6198.17		AS 10	2372.41		AS 6	282.105		AS 10	282.105		AS 6	2275.74		AS 10	1501.52
	AS 7	956987		AS 11	947824		AS 7	145.556		AS 11	22553.8		AS 7	534108		AS 11	811558		AS 7	9868.92		AS 11	10711.1		AS 7	2096.08		AS 11	22458.9		AS 7	4928.48		AS 11	3125.65		AS 7	962.998		AS 11	962.998		AS 7	589.829		AS 11	2104.64
	AS 8	1.47533e+06		AS 12	1.46052e+06		AS 8	11628.7		AS 12	24481.6		AS 8	212356		AS 12	711473		AS 8	8434.65		AS 12	12718.2		AS 8	3311.24		AS 12	28046.4		AS 8	10019.1		AS 12	3838.04		AS 8	1231.53		AS 12	1231.53		AS 8	2251.15		AS 12	2869.03
	Koi 1	1.07494e+06		Koi 5	880447		Koi 1	5556.12		Koi 5	5433.99		Koi 1	1.09867e+06		Koi 5	2877153		Koi 1	15994.6		Koi 5	3226.96		Koi 1	23832.4		Koi 5	15556		Koi 1	5913.05		Koi 5	3846.43		Koi 1	458.088		Koi 5	458.088		Koi 1	776.207		Koi 5	3831.16
	Koi 2	1.11884e+06		Koi 6	913863		Koi 2	754.738		Koi 6	20210		Koi 2	1.13804e+06		Koi 6	2280366		Koi 2	4883.5		Koi 6	4808.52		Koi 2	2619.17		Koi 6	14416.2		Koi 2	6654.8		Koi 6	3236.84		Koi 2	651.013		Koi 6	651.013		Koi 2	570.325		Koi 6	7194.58
	Koi 3	1.43203e+06		Koi 7	633824		Koi 3	3265.27		Koi 7	8600.91		Koi 3	622216		Koi 7	297203		Koi 3	6549.77		Koi 7	3766.65		Koi 3	7179.65		Koi 7	10051		Koi 3	6763.31		Koi 7	1981.94		Koi 3	289.524		Koi 7	289.524		Koi 3	570.214		Koi 7	1322.61
	Koi 4	1.60326e+06		Koi 8	1036850		Koi 4	2092.62		Koi 8	9451.1		Koi 4	1.05039e+06		Koi 8	3.79925e+06		Koi 4	10940.8		Koi 8	462.59		Koi 4	7212.2		Koi 8	16832.3		Koi 4	6087.1		Koi 8	3843.58		Koi 4	762.61		Koi 8	762.61		Koi 4	969.496		Koi 8	7771.37
	Koi 5	1.33681e+06		Koi 9	1.00747e+06		Koi 5	1932.07		Koi 9	4015.11		Koi 5	624830		Koi 9	3140713		Koi 5	8345.67		Koi 9	2595.48		Koi 5	3703.39		Koi 9	4700.84		Koi 5	9279.34		Koi 9	3181		Koi 5	798.131		Koi 9	798.131		Koi 5	3200.67		Koi 9	5199.68
	Koi 6	1.1369e+06		Koi 10	717970		Koi 6	2723.44		Koi 10	2770.27		Koi 6	208185		Koi 10	3.53044e+06		Koi 6	2445.95		Koi 10	1303.44		Koi 6	6845.25		Koi 10	3085.02		Koi 6	5938.44		Koi 10	2306.44		Koi 6	411.767		Koi 10	411.767		Koi 6	1031.53		Koi 10	3838.8
	Koi 7	957041		Koi 11	581766		Koi 7	820.495		Koi 11	5096.32		Koi 7	578637		Koi 11	1.04114e+06		Koi 7	4343.43		Koi 11	265.877		Koi 7	1247.4		Koi 11	2930.52		Koi 7	5170.92		Koi 11	1733.74		Koi 7	712.253		Koi 11	712.253		Koi 7	2469.81		Koi 11	3657.21
	Koi 8	441590		Koi 12	937801		Koi 8	3.78865		Koi 12	12295.9		Koi 8	17788.2		Koi 12	5.20304e+06		Koi 8	88.1295		Koi 12	10307.9		Koi 8	1447.84		Koi 12	4270.89		Koi 8	1619.67		Koi 12	2620.88		Koi 8	981.635		Koi 12	981.635		Koi 8	129.865		Koi 12	4097.28
	PS 1	1432464		PS 5	1.12606e+06		PS 1	3040.27		PS 5	17436.3		PS 1	1.33666e+06		PS 5	1650281		PS 1	44434.9		PS 5	5446.99		PS 1	29050.4		PS 5	11672.4		PS 1	4975.81		PS 5	3546.74		PS 1	386.276		PS 5	386.276		PS 1	4235.92		PS 5	2687.76
	PS 2	1.67827e+06		PS 6	1.10738e+06		PS 2	3477.11		PS 6	18014.1		PS 2	1.62983e+06		PS 6	1.72379e+06		PS 2	6021.39		PS 6	5040.71		PS 2	3251.99		PS 6	12510.1		PS 2	7195.78		PS 6	3855.32		PS 2	415.246		PS 6	415.246		PS 2	5355.08		PS 6	2914.07
	PS 3	1.30237e+06		PS 7	1.11168e+06		PS 3	1404.87		PS 7	41158.7		PS 3	1.50348e+06		PS 7	2.01139e+06		PS 3	12141.5		PS 7	6484.89		PS 3	4495.3		PS 7	7447.32		PS 3	6585.7		PS 7	2882.22		PS 3	468.311		PS 7	468.311		PS 3	1084.24		PS 7	2760.11
	PS 4	1.44389e+06		PS 8	1.32344e+06		PS 4	6988.36		PS 8	93335.3		PS 4	1.63864e+06		PS 8	1.43984e+06		PS 4	9317.91		PS 8	7521.6		PS 4	2530.14		PS 8	9896.47		PS 4	6268.09		PS 8	4934.34		PS 4	525.382		PS 8	525.382		PS 4	3822.95		PS 8	3468.45
	PS 5	1.68791e+06		PS 9	1.25586e+06		PS 5	381.443		PS 9	24065.9		PS 5	1.02026e+06		PS 9	753764		PS 5	1659.37		PS 9	8796.99		PS 5	3170.56		PS 9	11893.7		PS 5	4321.66		PS 9	2791.09		PS 5	175.207		PS 9	175.207		PS 5	1972.02		PS 9	1628.94
	PS 6	1.35719e+06		PS 10	984532		PS 6	5682.5		PS 10	3988.15		PS 6	1.17049e+06		PS 10	885361		PS 6	16827.2		PS 10	4334.74		PS 6	4001.7		PS 10	7794.92		PS 6	5833.71		PS 10	1984.38		PS 6	314.693		PS 10	314.693		PS 6	2127.88		PS 10	1060.89
	PS 7	947617		PS 11	966785		PS 7	2780.76		PS 11	5405.75		PS 7	784014		PS 11	585128		PS 7	4630.05		PS 11	6174.02		PS 7	2140.97		PS 11	7117.28		PS 7	2743.41		PS 11	3206.4		PS 7	178.9		PS 11	178.9		PS 7	1172.09		PS 11	885.497
	PS 8	1.26463e+06		PS 12	790757		PS 8	12727.7		PS 12	7217.57		PS 8	1.09913e+06		PS 12	486995		PS 8	7882.61		PS 12	12436.5		PS 8	3747.73		PS 12	20956.9		PS 8	7796.66		PS 12	1051.5		PS 8	149.997		PS 12	149.997		PS 8	2424.43		PS 12	644.654
	Rop 1	1.27099e+06		Rop 5	984593		Rop 1	5087.05		Rop 5	10183.3		Rop 1	271770		Rop 5	1.35775e+06		Rop 1	19748.9		Rop 5	8554.65		Rop 1	23755.1		Rop 5	9779.77		Rop 1	6596.95		Rop 5	3906.3		Rop 1	298.375		Rop 5	298.375		Rop 1	628.279		Rop 5	1488.65
	Rop 2	1.29929e+06		Rop 6	1.19034e+06		Rop 2	1526.24		Rop 6	26153.5		Rop 2	888147		Rop 6	2492720		Rop 2	12689		Rop 6	8992.65		Rop 2	6705.97		Rop 6	8548.09		Rop 2	8157.48		Rop 6	6222.21		Rop 2	1549.16		Rop 6	1549.16		Rop 2	1550.42		Rop 6	4504.65
	Rop 3	1.72897e+06		Rop 7	1.44428e+06		Rop 3	6077.86		Rop 7	28182.1		Rop 3	838909		Rop 7	2390940		Rop 3	13502.2		Rop 7	9396.54		Rop 3	9713.05		Rop 7	13247.9		Rop 3	7471.51		Rop 7	6076.85		Rop 3	365.487		Rop 7	365.487		Rop 3	379.987		Rop 7	2922.71
	Rop 4	1.07522e+06		Rop 8	1.19705e+06		Rop 4	2360		Rop 8	8409.12		Rop 4	234016		Rop 8	3.89095e+06		Rop 4	16074.6		Rop 8	7780.53		Rop 4	11625.4		Rop 8	8547.07		Rop 4	6436.48		Rop 8	5690.76		Rop 4	679.465		Rop 8	679.465		Rop 4	706.546		Rop 8	2509.83
	Rop 5	1.62731e+06		Rop 9	1.66116e+06		Rop 5	610.067		Rop 9	7253.17		Rop 5	334181		Rop 9	476889		Rop 5	20211.3		Rop 9	11487.1		Rop 5	12747.4		Rop 9	13125.7		Rop 5	11606.7		Rop 9	8108.26		Rop 5	799.232		Rop 9	799.232		Rop 5	1118.53		Rop 9	3261.09
	Rop 6	1066389		Rop 10	1.29574e+06		Rop 6	4042.73		Rop 10	11182.2		Rop 6	304636		Rop 10	333176		Rop 6	22169.7		Rop 10	14426.1		Rop 6	16709.6		Rop 10	21756.9		Rop 6	9099.3		Rop 10	3806.57		Rop 6	540.3		Rop 10	540.3		Rop 6	994.691		Rop 10	2903.92
	Rop 7	975644		Rop 11	1.33747e+06		Rop 7	1149.95		Rop 11	41240.7		Rop 7	443125		Rop 11	1.57231e+06		Rop 7	10541.8		Rop 11	15822		Rop 7	6005.22		Rop 11	14017.4		Rop 7	6685.74		Rop 11	3301.43		Rop 7	368.537		Rop 11	368.537		Rop 7	997.694		Rop 11	1652.54
	Rop 8	1.05818e+06		Rop 12	935772		Rop 8	16796.8		Rop 12	4226.91		Rop 8	1.0389e+06		Rop 12	388264		Rop 8	11823.6		Rop 12	11326.2		Rop 8	5261.2		Rop 12	12553.4		Rop 8	4457.79		Rop 12	3110.55		Rop 8	485.857		Rop 12	485.857		Rop 8	986.601		Rop 12	1709.92
	Contr. AS 1	884231		Ctrl. Rop 1	1.25282e+06		Contr. AS 1	19854.9		Ctrl. Rop 1	14914.9		Contr. AS 1	42403.6		Ctrl. Rop 1	34829.3		Contr. AS 1	27101.5		Ctrl. Rop 1	10766.2		Contr. AS 1	11759.1		Ctrl. Rop 1	10556		Contr. AS 1	2486.48		Ctrl. Rop 1	1313.76		Contr. AS 1	158.138		Ctrl. Rop 1	158.138		Contr. AS 1	1582.32		Ctrl. Rop 1	1246.12
	Contr. AS 2	749007		Ctrl. Rop 2	908396		Contr. AS 2	45393.9		Ctrl. Rop 2	8793.08		Contr. AS 2	33351		Ctrl. Rop 2	35559.8		Contr. AS 2	26582		Ctrl. Rop 2	12575.2		Contr. AS 2	12972.6		Ctrl. Rop 2	16638.4		Contr. AS 2	3039.9		Ctrl. Rop 2	4218.68		Contr. AS 2	109.958		Ctrl. Rop 2	109.958		Contr. AS 2	2925.76		Ctrl. Rop 2	2381.06
	Contr. AS 3	1.0369e+06		Ctrl. Rop 3	1.04587e+06		Contr. AS 3	13571.7		Ctrl. Rop 3	2097.06		Contr. AS 3	66717.1		Ctrl. Rop 3	149860		Contr. AS 3	32879.2		Ctrl. Rop 3	6898.13		Contr. AS 3	14095.5		Ctrl. Rop 3	11106		Contr. AS 3	2095.39		Ctrl. Rop 3	1264.38		Contr. AS 3	90.2566		Ctrl. Rop 3	90.2566		Contr. AS 3	1417.8		Ctrl. Rop 3	790.758
	Contr. AS 4	943660		Ctrl. Rop 4	1.67954e+06		Contr. AS 4	701.136		Ctrl. Rop 4	4938.75		Contr. AS 4	221903		Ctrl. Rop 4	39516		Contr. AS 4	29575.2		Ctrl. Rop 4	10435.5		Contr. AS 4	9884.01		Ctrl. Rop 4	21024.7		Contr. AS 4	2788.61		Ctrl. Rop 4	2275.94		Contr. AS 4	242.945		Ctrl. Rop 4	242.945		Contr. AS 4	816.824		Ctrl. Rop 4	1553.78
	Contr. PS 2	923481		Ctrl. Koi 2	1.25691e+06		Contr. PS 2	12299.3		Ctrl. Koi 2	3772.37		Contr. PS 2	39732.5		Ctrl. Koi 2	48388.2		Contr. PS 2	15511.3		Ctrl. Koi 2	639.051		Contr. PS 2	5428.47		Ctrl. Koi 2	46696.4		Contr. PS 2	3538.48		Ctrl. Koi 2	1861.24		Contr. PS 2	277.724		Ctrl. Koi 2	277.724		Contr. PS 2	649.866		Ctrl. Koi 2	6689.88
	Contr. PS 3	1.05633e+06		Ctrl. Koi 3	969306		Contr. PS 3	15665.3		Ctrl. Koi 3	15493.3		Contr. PS 3	31243.9		Ctrl. Koi 3	66993.6		Contr. PS 3	24331.1		Ctrl. Koi 3	4325.63		Contr. PS 3	20745.7		Ctrl. Koi 3	38013.4		Contr. PS 3	4555.92		Ctrl. Koi 3	1584.2		Contr. PS 3	259.085		Ctrl. Koi 3	259.085		Contr. PS 3	563.956		Ctrl. Koi 3	4695.64
	Contr. PS 4	1189428		Ctrl. Koi 4	1.13305e+06		Contr. PS 4	5687.01		Ctrl. Koi 4	5181.53		Contr. PS 4	44310.3		Ctrl. Koi 4	43699.4		Contr. PS 4	12462.1		Ctrl. Koi 4	3729.46		Contr. PS 4	7686.05		Ctrl. Koi 4	33111.9		Contr. PS 4	4132.93		Ctrl. Koi 4	1309.59		Contr. PS 4	217.97		Ctrl. Koi 4	217.97		Contr. PS 4	1248.06		Ctrl. Koi 4	2720.35
	Contr. PS1	912744		Ctrl. Koi 1	856531		Contr. PS1	2314.02		Ctrl. Koi 1	28691.1		Contr. PS1	25860.9		Ctrl. Koi 1	85323.4		Contr. PS1	7853.63		Ctrl. Koi 1	9517.05		Contr. PS1	5542.47		Ctrl. Koi 1	36001		Contr. PS1	2020.71		Ctrl. Koi 1	942.899		Contr. PS1	280.574		Ctrl. Koi 1	280.574		Contr. PS1	645.428		Ctrl. Koi 1	3369.94
	40S		IGM		MX2		CD8b1		CD4		IL6a		Tnfa2		IL10		IL1b		GZMA		muc5b
	Cohabiation II		Cohabiation II		Cohabiation II		Cohabiation II		Cohabiation II		Cohabiation II		Cohabiation II		Cohabiation II		Cohabiation II		Cohabiation II		Cohabiation II
																									CEV											CEV
	Sample Name	Quantity Mean	Sample Name	Quantity Mean	Sample Name	Quantity Mean	Sample Name	Quantity Mean	Sample Name	Quantity Mean	Sample Name	Quantity Mean	Sample Name	Quantity Mean	Sample Name	Quantity Mean	Sample Name	Quantity Mean	Sample Name	Quantity Mean	Sample Name	Quantity Mean			norm												norm
																									co ii												co ii
																										IGM	MX2	CD8b1	CD4	IL6a	Tnfa2	IL10	IL1b	ZGMA	mucb5			IGM	MX2	CD8b1	CD4	IL6a	Tnfa2	IL10	IL1b	GZMA	Muc5b
	AS 1	1.87167e+06	AS 1	3951.17	AS 1	12736393	AS 1	10827.8	AS 1	4545.35	AS 1	6293.21	AS 1	1210.25	AS 1	1719.26	AS 1	13753.2	AS 1	2803.51	AS 1	634316			AS 1	211.104	680483	578.511	242.85	336.235	64.6618	91.8572	734.809	149.787	33890.4		AS 1	211.104	680483	578.511	242.85	336.235	64.6618	91.8572	734.809	149.787	33890.4		AS 5
	AS 2	777564	AS 2	419.041	AS 2	236064	AS 2	5477.3	AS 2	575.596	AS 2	5306.73	AS 2	687.981	AS 2	529.607	AS 2	152495	AS 2	254.79	AS 2	672168			AS 2	53.8916	30359.5	704.418	74.0255	682.481	88.4791	68.1111	19611.8	32.7678	86445.3		AS 2	53.8916	30359.5	704.418	74.0255	682.481	88.4791	68.1111	19611.8	32.7678	86445.3		AS 6
	AS 3	1.40649e+06	AS 3	551.194	AS 3	209941	AS 3	9056.03	AS 3	1772.28	AS 3	6636.95	AS 3	274.354	AS 3	1692.21	AS 3	34500.1	AS 3	737.368	AS 3	1.04804e+06			AS 3	39.1893	14926.6	643.874	126.007	471.881	19.5063	120.314	2452.92	52.4261	74514.8		AS 3	39.1893	14926.6	643.874	126.007	471.881	19.5063	120.314	2452.92	52.4261	74514.8		AS 7
	AS 4	1.33258e+06	AS 4	3086.33	AS 4	523625	AS 4	9476.23	AS 4	6881.21	AS 4	5552.95	AS 4	615.255	AS 4	1640.56	AS 4	85034.9	AS 4	1759.39	AS 4	731088			AS 4	231.605	39294	711.118	516.382	416.706	46.1702	123.111	6381.21	132.029	54862.5		AS 4	231.605	39294	711.118	516.382	416.706	46.1702	123.111	6381.21	132.029	54862.5		AS 8
	AS 5	1.58477e+06	AS 5	7088.34	AS 5	353035	AS 5	18857.1	AS 5	8928.39	AS 5	8306.6	AS 5	317.984	AS 5	1450.11	AS 5	229786	AS 5	4024.71	AS 5	4330812			AS 5	447.28	22276.8	1189.9	563.388	524.153	20.065	91.5031	14499.7	253.963	273278			133.948	191266	659.48	239.816	476.826	54.7043	100.848	7295.2	91.7523	62428.3
	AS 6	1.14246e+06	AS 6	14102	AS 6	528289	AS 6	7152.64	AS 6	2086.94	AS 6	6198.17	AS 6	282.105	AS 6	2275.74	AS 6	528831	AS 6	503.892	AS 6	709549			AS 6	1234.36	46241.6	626.076	182.671	542.531	24.6928	199.197	46289	44.106	62107.3			101.453	326300	61.875	197.431	147.985	29.164	25.9944	8544.42	57.7809	23054.7
	AS 7	956987	AS 7	145.556	AS 7	534108	AS 7	9868.92	AS 7	2096.08	AS 7	4928.48	AS 7	962.998	AS 7	589.829	AS 7	91456.6	AS 7	1243.64	AS 7	832994			AS 7	15.2098	55811.4	1031.25	219.029	515	100.628	61.634	9556.72	129.953	87043.4
	AS 8	1.47533e+06	AS 8	11628.7	AS 8	212356	AS 8	8434.65	AS 8	3311.24	AS 8	10019.1	AS 8	1231.53	AS 8	2251.15	AS 8	798151	AS 8	1542.13	AS 8	621488			AS 8	788.21	14393.8	571.712	224.44	679.109	83.4748	152.586	54099.8	104.528	42125.3			IGM	MX2	CD8b1	CD4	IL6a	Tnfa2	IL10	IL1b	GZMA	Muc5b
	Koi 1	1.07494e+06	Koi 1	5556.12	Koi 1	1.09867e+06	Koi 1	15994.6	Koi 1	23832.4	Koi 1	5913.05	Koi 1	458.088	Koi 1	776.207	Koi 1	146101	Koi 1	2284.89	Koi 1	668010			Koi 1	516.875	102207	1487.95	2217.08	550.08	42.615	72.209	13591.5	212.558	62143.7		Koi 1	516.875	102207	1487.95	2217.08	550.08	42.615	72.209	13591.5	212.558	62143.7		Koi 5
	Koi 2	1.11884e+06	Koi 2	754.738	Koi 2	1.13804e+06	Koi 2	4883.5	Koi 2	2619.17	Koi 2	6654.8	Koi 2	651.013	Koi 2	570.325	Koi 2	66373.9	Koi 2	860.671	Koi 2	466717			Koi 2	67.457	101716	436.478	234.096	594.793	58.1862	50.9745	5932.36	76.925	41714.2		Koi 2	67.457	101716	436.478	234.096	594.793	58.1862	50.9745	5932.36	76.925	41714.2		Koi 6
	Koi 3	1.43203e+06	Koi 3	3265.27	Koi 3	622216	Koi 3	6549.77	Koi 3	7179.65	Koi 3	6763.31	Koi 3	289.524	Koi 3	570.214	Koi 3	71388.4	Koi 3	1479.38	Koi 3	731852			Koi 3	228.017	43449.9	457.377	501.362	472.289	20.2178	39.8186	4985.12	103.306	51105.9		Koi 3	228.017	43449.9	457.377	501.362	472.289	20.2178	39.8186	4985.12	103.306	51105.9		Koi 7
	Koi 4	1.60326e+06	Koi 4	2092.62	Koi 4	1.05039e+06	Koi 4	10940.8	Koi 4	7212.2	Koi 4	6087.1	Koi 4	762.61	Koi 4	969.496	Koi 4	89719.6	Koi 4	1367.29	Koi 4	542529			Koi 4	130.523	65516	682.412	449.846	379.67	47.5662	60.4703	5596.07	85.2821	33839.1		Koi 4	130.523	65516	682.412	449.846	379.67	47.5662	60.4703	5596.07	85.2821	33839.1		Koi 8
	Koi 5	1.33681e+06	Koi 5	1932.07	Koi 5	624830	Koi 5	8345.67	Koi 5	3703.39	Koi 5	9279.34	Koi 5	798.131	Koi 5	3200.67	Koi 5	1124588	Koi 5	712.29	Koi 5	470876			Koi 5	144.529	46740.4	624.299	277.032	694.142	59.7043	239.426	84124.9	53.2829	35223.9			235.718	78222.3	766.053	850.595	499.208	42.1463	55.8681	7526.25	119.518	47200.7
	Koi 6	1.1369e+06	Koi 6	2723.44	Koi 6	208185	Koi 6	2445.95	Koi 6	6845.25	Koi 6	5938.44	Koi 6	411.767	Koi 6	1031.53	Koi 6	52410.5	Koi 6	1447.71	Koi 6	493123			Koi 6	239.549	18311.5	215.141	602.096	522.334	36.2182	90.7312	4609.93	127.338	43374.2			198.735	28854.8	493.972	918.315	94.4076	15.9972	13.7809	4062.43	62.9963	12209
	Koi 7	957041	Koi 7	820.495	Koi 7	578637	Koi 7	4343.43	Koi 7	1247.4	Koi 7	5170.92	Koi 7	712.253	Koi 7	2469.81	Koi 7	953534	Koi 7	291.239	Koi 7	206368			Koi 7	85.7325	60461.1	453.84	130.34	540.303	74.4224	258.067	99633.6	30.4312	21563.1
	Koi 8	441590	Koi 8	3.78865	Koi 8	17788.2	Koi 8	88.1295	Koi 8	1447.84	Koi 8	1619.67	Koi 8	981.635	Koi 8	129.865	Koi 8	12839	Koi 8	14.9102	Koi 8	693614			Koi 8	0.857955	4028.21	19.9573	327.869	366.782	222.295	29.4084	2907.45	3.37647	157072			IGM	MX2	CD8b1	CD4	IL6a	Tnfa2	IL10	IL1b	GZMA	Muc5b
	PS 1	1432464	PS 1	3040.27	PS 1	1.33666e+06	PS 1	44434.9	PS 1	29050.4	PS 1	4975.81	PS 1	386.276	PS 1	4235.92	PS 1	42528.8	PS 1	4165.44	PS 1	814543			PS 1	212.241	93312.2	3101.99	2028	347.36	26.9659	295.709	2968.93	290.788	56863.1		PS 1	212.241	93312.2	3101.99	2028	347.36	26.9659	295.709	2968.93	290.788	56863.1		PS 5
	PS 2	1.67827e+06	PS 2	3477.11	PS 2	1.62983e+06	PS 2	6021.39	PS 2	3251.99	PS 2	7195.78	PS 2	415.246	PS 2	5355.08	PS 2	197231	PS 2	1339.45	PS 2	598416			PS 2	207.184	97113.8	358.786	193.771	428.762	24.7425	319.084	11752.1	79.8115	35656.8		PS 2	207.184	97113.8	358.786	193.771	428.762	24.7425	319.084	11752.1	79.8115	35656.8		PS 6
	PS 3	1.30237e+06	PS 3	1404.87	PS 3	1.50348e+06	PS 3	12141.5	PS 3	4495.3	PS 3	6585.7	PS 3	468.311	PS 3	1084.24	PS 3	16848.3	PS 3	1972.8	PS 3	901441			PS 3	107.87	115442	932.266	345.163	505.671	35.9584	83.2515	1293.67	151.478	69215.5		PS 3	107.87	115442	932.266	345.163	505.671	35.9584	83.2515	1293.67	151.478	69215.5		PS 7
	PS 4	1.44389e+06	PS 4	6988.36	PS 4	1.63864e+06	PS 4	9317.91	PS 4	2530.14	PS 4	6268.09	PS 4	525.382	PS 4	3822.95	PS 4	19681.6	PS 4	1559.99	PS 4	660246			PS 4	483.994	113487	645.331	175.23	434.11	36.3864	264.767	1363.09	108.04	45726.7		PS 4	483.994	113487	645.331	175.23	434.11	36.3864	264.767	1363.09	108.04	45726.7		PS 8
	PS 5	1.68791e+06	PS 5	381.443	PS 5	1.02026e+06	PS 5	1659.37	PS 5	3170.56	PS 5	4321.66	PS 5	175.207	PS 5	1972.02	PS 5	845177	PS 5	474.187	PS 5	674338			PS 5	22.5986	60444.9	98.3091	187.839	256.036	10.3801	116.832	50072.4	28.0932	39951.1			252.822	104839	1259.59	685.542	428.976	31.0133	240.703	4344.43	157.529	51865.5
	PS 6	1.35719e+06	PS 6	5682.5	PS 6	1.17049e+06	PS 6	16827.2	PS 6	4001.7	PS 6	5833.71	PS 6	314.693	PS 6	2127.88	PS 6	104763	PS 6	1588.58	PS 6	1.08915e+06			PS 6	418.695	86243.2	1239.85	294.851	429.836	23.1871	156.785	7719.1	117.049	80250.5			161.432	11251.1	1250.38	898.206	64.7295	6.02852	107.299	4998.68	93.6016	14450
	PS 7	947617	PS 7	2780.76	PS 7	784014	PS 7	4630.05	PS 7	2140.97	PS 7	2743.41	PS 7	178.9	PS 7	1172.09	PS 7	80889.7	PS 7	744.466	PS 7	714649			PS 7	293.448	82735.3	488.599	225.932	289.506	18.879	123.688	8536.12	78.562	75415.4
	PS 8	1.26463e+06	PS 8	12727.7	PS 8	1.09913e+06	PS 8	7882.61	PS 8	3747.73	PS 8	7796.66	PS 8	149.997	PS 8	2424.43	PS 8	141509	PS 8	1063.81	PS 8	1.11598e+06			PS 8	1006.44	86912.8	623.313	296.349	616.516	11.8609	191.711	11189.8	84.1199	88245.7			IGM	MX2	CD8b1	CD4	IL6a	Tnfa2	IL10	IL1b	GZMA	Muc5b
	Rop 1	1.27099e+06	Rop 1	5087.05	Rop 1	271770	Rop 1	19748.9	Rop 1	23755.1	Rop 1	6596.95	Rop 1	298.375	Rop 1	628.279	Rop 1	16426.5	Rop 1	4213.05	Rop 1	487788			Rop 1	400.244	21382.6	1553.82	1869.03	519.041	23.4759	49.4324	1292.42	331.479	38378.7		Rop 1	400.244	21382.6	1553.82	1869.03	519.041	23.4759	49.4324	1292.42	331.479	38378.7		Rop 5
	Rop 2	1.29929e+06	Rop 2	1526.24	Rop 2	888147	Rop 2	12689	Rop 2	6705.97	Rop 2	8157.48	Rop 2	1549.16	Rop 2	1550.42	Rop 2	95658.8	Rop 2	1852	Rop 2	428340			Rop 2	117.468	68356.5	976.61	516.127	627.842	119.232	119.329	7362.41	142.54	32967.3		Rop 2	117.468	68356.5	976.61	516.127	627.842	119.232	119.329	7362.41	142.54	32967.3		Rop 6
	Rop 3	1.72897e+06	Rop 3	6077.86	Rop 3	838909	Rop 3	13502.2	Rop 3	9713.05	Rop 3	7471.51	Rop 3	365.487	Rop 3	379.987	Rop 3	12035	Rop 3	2772.14	Rop 3	520284			Rop 3	351.531	48520.8	780.94	561.783	432.137	21.139	21.9777	696.079	160.335	30092.2		Rop 3	351.531	48520.8	780.94	561.783	432.137	21.139	21.9777	696.079	160.335	30092.2		Rop 7
	Rop 4	1.07522e+06	Rop 4	2360	Rop 4	234016	Rop 4	16074.6	Rop 4	11625.4	Rop 4	6436.48	Rop 4	679.465	Rop 4	706.546	Rop 4	7574.17	Rop 4	1331.69	Rop 4	464934			Rop 4	219.491	21764.5	1495.01	1081.22	598.622	63.1934	65.712	704.432	123.853	43241		Rop 4	219.491	21764.5	1495.01	1081.22	598.622	63.1934	65.712	704.432	123.853	43241		Rop 8
	Rop 5	1.62731e+06	Rop 5	610.067	Rop 5	334181	Rop 5	20211.3	Rop 5	12747.4	Rop 5	11606.7	Rop 5	799.232	Rop 5	1118.53	Rop 5	113713	Rop 5	2019.33	Rop 5	869953			Rop 5	37.4892	20535.8	1242	783.34	713.246	49.1136	68.735	6987.81	124.09	53459.5			272.183	40006.1	1201.59	1007.04	544.411	56.76	64.1127	2513.84	189.552	36169.8
	Rop 6	1066389	Rop 6	4042.73	Rop 6	304636	Rop 6	22169.7	Rop 6	16709.6	Rop 6	9099.3	Rop 6	540.3	Rop 6	994.691	Rop 6	14244.4	Rop 6	1586.48	Rop 6	972770			Rop 6	379.104	28567	2078.95	1566.93	853.281	50.6663	93.2766	1335.76	148.771	91220.9			128.334	22773	381.979	629.226	87.8422	45.9012	40.997	3244.42	95.7832	5833.09
	Rop 7	975644	Rop 7	1149.95	Rop 7	443125	Rop 7	10541.8	Rop 7	6005.22	Rop 7	6685.74	Rop 7	368.537	Rop 7	997.694	Rop 7	77628	Rop 7	1931.79	Rop 7	1110499			Rop 7	117.866	45418.7	1080.5	615.513	685.264	37.7737	102.26	7956.59	198.001	113822
	Rop 8	1.05818e+06	Rop 8	16796.8	Rop 8	1.0389e+06	Rop 8	11823.6	Rop 8	5261.2	Rop 8	4457.79	Rop 8	485.857	Rop 8	986.601	Rop 8	57447.6	Rop 8	634.588	Rop 8	3695897			Rop 8	1587.32	98177.5	1117.35	497.191	421.268	45.9142	93.2352	5428.89	59.9695	349268			IGM	MX2	CD8b1	CD4	IL6a	Tnfa2	IL10	IL1b	GZMA	Muc5b
	Contr. AS 1	884231	Contr. AS 1	19854.9	Contr. AS 1	42403.6	Contr. AS 1	27101.5	Contr. AS 1	11759.1	Contr. AS 1	2486.48	Contr. AS 1	158.138	Contr. AS 1	1582.32	Contr. AS 1	5566.03	Contr. AS 1	5959.52	Contr. AS 1	432737			Contr. AS 1	2245.44	4795.53	3064.98	1329.86	281.203	17.8843	178.948	629.477	673.978	48939.3		Contr. AS 1	2245.44	4795.53	3064.98	1329.86	281.203	17.8843	178.948	629.477	673.978	48939.3		Contr. PS 2
	Contr. AS 2	749007	Contr. AS 2	45393.9	Contr. AS 2	33351	Contr. AS 2	26582	Contr. AS 2	12972.6	Contr. AS 2	3039.9	Contr. AS 2	109.958	Contr. AS 2	2925.76	Contr. AS 2	10042.4	Contr. AS 2	8046.47	Contr. AS 2	525963			Contr. AS 2	6060.54	4452.7	3548.96	1731.97	405.857	14.6804	390.619	1340.76	1074.28	70221.4		Contr. AS 2	6060.54	4452.7	3548.96	1731.97	405.857	14.6804	390.619	1340.76	1074.28	70221.4		Contr. PS 3
	Contr. AS 3	1.0369e+06	Contr. AS 3	13571.7	Contr. AS 3	66717.1	Contr. AS 3	32879.2	Contr. AS 3	14095.5	Contr. AS 3	2095.39	Contr. AS 3	90.2566	Contr. AS 3	1417.8	Contr. AS 3	5136	Contr. AS 3	12232.6	Contr. AS 3	623319			Contr. AS 3	1308.87	6434.27	3170.91	1359.38	202.082	8.70443	136.734	495.321	1179.72	60113.5		Contr. AS 3	1308.87	6434.27	3170.91	1359.38	202.082	8.70443	136.734	495.321	1179.72	60113.5		Contr. PS 4
	Contr. AS 4	943660	Contr. AS 4	701.136	Contr. AS 4	221903	Contr. AS 4	29575.2	Contr. AS 4	9884.01	Contr. AS 4	2788.61	Contr. AS 4	242.945	Contr. AS 4	816.824	Contr. AS 4	5861.83	Contr. AS 4	665.709	Contr. AS 4	288304			Contr. AS 4	74.2996	23515.1	3134.1	1047.41	295.51	25.745	86.5591	621.18	70.5454	30551.6		Contr. AS 4	74.2996	23515.1	3134.1	1047.41	295.51	25.745	86.5591	621.18	70.5454	30551.6		Contr. PS1
	Contr. PS 2	923481	Contr. PS 2	12299.3	Contr. PS 2	39732.5	Contr. PS 2	15511.3	Contr. PS 2	5428.47	Contr. PS 2	3538.48	Contr. PS 2	277.724	Contr. PS 2	649.866	Contr. PS 2	5092.79	Contr. PS 2	4557.14	Contr. PS 2	548511			Contr. PS 2	1331.85	4302.47	1679.65	587.827	383.168	30.0736	70.3713	551.478	493.474	59396			2422.29	9799.4	3229.74	1367.16	296.163	16.7535	198.215	771.686	749.633	52456.5
	Contr. PS 3	1.05633e+06	Contr. PS 3	15665.3	Contr. PS 3	31243.9	Contr. PS 3	24331.1	Contr. PS 3	20745.7	Contr. PS 3	4555.92	Contr. PS 3	259.085	Contr. PS 3	563.956	Contr. PS 3	3824.78	Contr. PS 3	3519.43	Contr. PS 3	708377			Contr. PS 3	1482.99	2957.76	2303.36	1963.93	431.295	24.5268	53.388	362.081	333.174	67059.9			2583.34	9184.61	217.297	280.935	83.8814	7.09955	133.713	384.319	502.414	16994.3
	Contr. PS 4	1189428	Contr. PS 4	5687.01	Contr. PS 4	44310.3	Contr. PS 4	12462.1	Contr. PS 4	7686.05	Contr. PS 4	4132.93	Contr. PS 4	217.97	Contr. PS 4	1248.06	Contr. PS 4	6669.77	Contr. PS 4	1846.27	Contr. PS 4	484333			Contr. PS 4	478.13	3725.34	1047.74	646.198	347.472	18.3257	104.929	560.755	155.224	40719.8
	Contr. PS1	912744	Contr. PS1	2314.02	Contr. PS1	25860.9	Contr. PS1	7853.63	Contr. PS1	5542.47	Contr. PS1	2020.71	Contr. PS1	280.574	Contr. PS1	645.428	Contr. PS1	5960.14	Contr. PS1	2519.24	Contr. PS1	623446			Contr. PS1	253.523	2833.31	860.442	607.231	221.388	30.7396	70.7129	652.991	276.007	68304.5			IGM	MX2	CD8b1	CD4	IL6a	Tnfa2	IL10	IL1b	GZMA	Muc5b
	Ctrl. Rop 1	1.25282e+06	Ctrl. Rop 1	14914.9	Ctrl. Rop 1	34829.3	Ctrl. Rop 1	10766.2	Ctrl. Rop 1	10556	Ctrl. Rop 1	1313.76	Ctrl. Rop 1	158.138	Ctrl. Rop 1	1246.12	Ctrl. Rop 1	9175.06	Ctrl. Rop 1	1964.8	Ctrl. Rop 1	516167			Ctrl. Rop 1	1190.5	2780.06	859.353	842.58	104.864	12.6226	99.4649	732.35	156.83	41200.3		Ctrl. Rop 1	1190.5	2780.06	859.353	842.58	104.864	12.6226	99.4649	732.35	156.83	41200.3		Ctrl. Koi 2
	Ctrl. Rop 2	908396	Ctrl. Rop 2	8793.08	Ctrl. Rop 2	35559.8	Ctrl. Rop 2	12575.2	Ctrl. Rop 2	16638.4	Ctrl. Rop 2	4218.68	Ctrl. Rop 2	109.958	Ctrl. Rop 2	2381.06	Ctrl. Rop 2	13096.9	Ctrl. Rop 2	4291.65	Ctrl. Rop 2	584796			Ctrl. Rop 2	967.979	3914.57	1384.33	1831.63	464.41	12.1046	262.117	1441.76	472.442	64376.7		Ctrl. Rop 2	967.979	3914.57	1384.33	1831.63	464.41	12.1046	262.117	1441.76	472.442	64376.7		Ctrl. Koi 3
	Ctrl. Rop 3	1.04587e+06	Ctrl. Rop 3	2097.06	Ctrl. Rop 3	149860	Ctrl. Rop 3	6898.13	Ctrl. Rop 3	11106	Ctrl. Rop 3	1264.38	Ctrl. Rop 3	90.2566	Ctrl. Rop 3	790.758	Ctrl. Rop 3	3576.71	Ctrl. Rop 3	1688.08	Ctrl. Rop 3	458173			Ctrl. Rop 3	200.509	14328.7	659.559	1061.89	120.892	8.62981	75.6078	341.984	161.404	43807.9		Ctrl. Rop 3	200.509	14328.7	659.559	1061.89	120.892	8.62981	75.6078	341.984	161.404	43807.9		Ctrl. Koi 4
	Ctrl. Rop 4	1.67954e+06	Ctrl. Rop 4	4938.75	Ctrl. Rop 4	39516	Ctrl. Rop 4	10435.5	Ctrl. Rop 4	21024.7	Ctrl. Rop 4	2275.94	Ctrl. Rop 4	242.945	Ctrl. Rop 4	1553.78	Ctrl. Rop 4	8529.5	Ctrl. Rop 4	5489.84	Ctrl. Rop 4	276761			Ctrl. Rop 4	294.053	2352.78	621.327	1251.81	135.509	14.4649	92.5118	507.846	326.865	16478.3		Ctrl. Rop 4	294.053	2352.78	621.327	1251.81	135.509	14.4649	92.5118	507.846	326.865	16478.3		Ctrl. Koi 1
	Ctrl. Koi 2	1.25691e+06	Ctrl. Koi 2	3772.37	Ctrl. Koi 2	48388.2	Ctrl. Koi 2	639.051	Ctrl. Koi 2	46696.4	Ctrl. Koi 2	1861.24	Ctrl. Koi 2	277.724	Ctrl. Koi 2	6689.88	Ctrl. Koi 2	6911.06	Ctrl. Koi 2	5521.72	Ctrl. Koi 2	257086			Ctrl. Koi 2	300.13	3849.77	50.8429	3715.17	148.08	22.0957	532.247	549.844	439.308	20453.8			663.261	5844.04	881.142	1246.98	206.419	11.9555	132.425	755.984	279.385	41465.8
	Ctrl. Koi 3	969306	Ctrl. Koi 3	15493.3	Ctrl. Koi 3	66993.6	Ctrl. Koi 3	4325.63	Ctrl. Koi 3	38013.4	Ctrl. Koi 3	1584.2	Ctrl. Koi 3	259.085	Ctrl. Koi 3	4695.64	Ctrl. Koi 3	6894.48	Ctrl. Koi 3	11665.7	Ctrl. Koi 3	557109			Ctrl. Koi 3	1598.39	6911.5	446.261	3921.72	163.436	26.729	484.433	711.28	1203.51	57475			490.336	5694.73	351.319	424.12	172.449	2.43753	87.0394	484.359	151.068	19620.1
	Ctrl. Koi 4	1.13305e+06	Ctrl. Koi 4	5181.53	Ctrl. Koi 4	43699.4	Ctrl. Koi 4	3729.46	Ctrl. Koi 4	33111.9	Ctrl. Koi 4	1309.59	Ctrl. Koi 4	217.97	Ctrl. Koi 4	2720.35	Ctrl. Koi 4	9600.31	Ctrl. Koi 4	3772.47	Ctrl. Koi 4	887667			Ctrl. Koi 4	457.307	3856.79	329.152	2922.37	115.581	19.2375	240.091	847.297	332.947	78343
	Ctrl. Koi 1	856531	Ctrl. Koi 1	28691.1	Ctrl. Koi 1	85323.4	Ctrl. Koi 1	9517.05	Ctrl. Koi 1	36001	Ctrl. Koi 1	942.899	Ctrl. Koi 1	280.574	Ctrl. Koi 1	3369.94	Ctrl. Koi 1	5825.71	Ctrl. Koi 1	4640.14	Ctrl. Koi 1	1.29209e+06			Ctrl. Koi 1	3349.69	9961.5	1111.12	4203.11	110.083	32.757	393.441	680.152	541.736	150852		MX2 Mean							CD8b1 Mean
																														Ctr	6d	11d				Ctr	6d	11d					Ctr	6d	11d
																												IgM Mean	AS	2422.29	133.948	621.264			AS	9799.4	191266	34680.9				AS	3229.74	659.48	854.733
																													Koi	1426.38	235.718	117.667			Koi	6144.89	78222.3	32385.3				Koi	484.343	766.053	328.309
																													PS	886.621	252.822	435.294			PS	3454.72	104839	79084.1				PS	1472.8	1259.59	612.518
																													Rop	663.261	272.183	530.445			Rop	5844.04	40006.1	48174.8				Rop	881.142	1201.59	1379.7
				IGM	MX2	CD8b1	CD4	IL6a	Tnfa2	IL10	IL1b	ZGMA	muc5b
	AS 1	as	cev6d	2.3245	5.83282	2.76231	2.38534	2.52664	1.81065	1.96311	2.86617	2.17547	4.53008																IgM Sd						MX2 Sd							CD8b1 Sd
	AS 2	as	cev6d	1.73152	4.48229	2.84783	1.86938	2.83409	1.94684	1.83322	4.29252	1.51545	4.93674																AS	2583.34	101.453	516.825			AS	9184.61	326300	19541.2				AS	217.297	61.875	303.247
	AS 3	as	cev6d	1.59317	4.17396	2.8088	2.1004	2.67383	1.29018	2.08032	3.38968	1.71955	4.87224																Koi	1406.68	198.735	100.401			Koi	2924.45	28854.8	25797.4				Koi	449.556	493.972	265.365
	AS 4	as	cev6d	2.36475	4.59433	2.85194	2.71297	2.61983	1.66436	2.0903	3.8049	2.12067	4.73928																PS	611.434	161.432	415.097			PS	3454.72	11251.1	12560.4				PS	655.303	1250.38	473.789
	AS 5	as	cev11d	2.65058	4.34785	3.07551	2.75081	2.71946	1.30244	1.96144	4.16136	2.40477	5.4366																Rop	490.336	128.334	719.518			Rop	5694.73	22773	34910.6				Rop	351.319	381.979	471.263
	AS 6	as	cev11d	3.09144	4.66503	2.79663	2.26167	2.73442	1.39257	2.29928	4.66548	1.6445	4.79314
	AS 7	as	cev11d	1.18212	4.74672	3.01336	2.3405	2.71181	2.00272	1.78982	3.98031	2.11379	4.93974
	AS 8	as	cev11d	2.89664	4.15817	2.75718	2.3511	2.83194	1.92156	2.18352	4.7332	2.01923	4.62454
	Koi 1	koi	cev6d	2.71339	5.00948	3.17259	3.34578	2.74043	1.62956	1.85859	4.13327	2.32748	4.7934
	Koi 2	koi	cev6d	1.82903	5.00739	2.63996	2.36939	2.77437	1.76482	1.70735	3.77323	1.88607	4.62028
	Koi 3	koi	cev6d	2.35797	4.63799	2.66027	2.70015	2.67421	1.30573	1.60009	3.69768	2.01413	4.70847
	Koi 4	koi	cev6d	2.11569	4.81635	2.83405	2.65306	2.57941	1.6773	1.78154	3.74788	1.93086	4.52942
	Koi 5	koi	cev11d	2.15995	4.66969	2.79539	2.44253	2.84145	1.77601	2.37917	4.92492	1.72659	4.54684
	Koi 6	koi	cev11d	2.37939	4.26273	2.33272	2.77967	2.71795	1.55893	1.95776	3.66369	2.10496	4.63723
	Koi 7	koi	cev11d	1.93315	4.78148	2.6569	2.11508	2.73264	1.8717	2.41173	4.99841	1.48332	4.33371
	Koi 8	koi	cev11d	-0.0665353	3.60511	1.3001	2.5157	2.56441	2.34693	1.46847	3.46351	0.528463	5.1961
	PS 1	ps	cev6d	2.32683	4.96994	3.49164	3.30707	2.54078	1.43081	2.47086	3.4726	2.46358	4.75483
	PS 2	ps	cev6d	2.31636	4.98728	2.55484	2.28729	2.63222	1.39344	2.5039	4.07011	1.90207	4.55214
	PS 3	ps	cev6d	2.0329	5.06236	2.96954	2.53802	2.70387	1.5558	1.92039	3.11182	2.18035	4.8402
	PS 4	ps	cev6d	2.68484	5.05495	2.80978	2.24361	2.6376	1.56094	2.42286	3.13452	2.03358	4.66017
	PS 5	ps	cev11d	1.35408	4.78136	1.99259	2.27379	2.4083	1.0162	2.06756	4.6996	1.4486	4.60153
	PS 6	ps	cev11d	2.6219	4.93572	3.09337	2.4696	2.6333	1.36525	2.19531	3.88757	2.06837	4.90445
	PS 7	ps	cev11d	2.46753	4.91769	2.68895	2.35398	2.46166	1.27598	2.09233	3.93126	1.89521	4.87746
	PS 8	ps	cev11d	3.00279	4.93908	2.79471	2.4718	2.78994	1.07412	2.28265	4.04882	1.9249	4.94569
	Rop 1	rop	cev6d	2.60232	4.33006	3.1914	3.27162	2.7152	1.37062	1.69401	3.1114	2.52046	4.58409
	Rop 2	rop	cev6d	2.06992	4.83478	2.98972	2.71276	2.79785	2.07639	2.07675	3.86702	2.15394	4.51808
	Rop 3	rop	cev6d	2.54596	4.68593	2.89262	2.74957	2.63562	1.32509	1.34198	2.84266	2.20503	4.47845
	Rop 4	rop	cev6d	2.34142	4.33775	3.17464	3.03391	2.77715	1.80067	1.81764	2.84784	2.09291	4.6359
	Rop 5	rop	cev11d	1.57391	4.31251	3.09412	2.89395	2.85324	1.6912	1.83718	3.84434	2.09374	4.72802
	Rop 6	rop	cev11d	2.57876	4.45587	3.31784	3.19505	2.93109	1.70472	1.96977	3.12573	2.17252	4.96009
	Rop 7	rop	cev11d	2.07139	4.65723	3.03362	2.78924	2.83586	1.57719	2.00971	3.90073	2.29667	5.05623
	Rop 8	rop	cev11d	3.20066	4.99201	3.04819	2.69652	2.62456	1.66195	1.96958	3.73471	1.77793	5.54316
	Contr. AS 1	as	ctr	3.3513	3.68084	3.48643	3.12381	2.44902	1.25247	2.25273	2.79898	2.82865	4.68966
	Contr. AS 2	as	ctr	3.78251	3.64862	3.5501	3.23854	2.60837	1.16674	2.59175	3.12735	3.03112	4.84647
	Contr. AS 3	as	ctr	3.1169	3.8085	3.50118	3.13334	2.30553	0.939741	2.13588	2.69489	3.07178	4.77897
	Contr. AS 4	as	ctr	1.87099	4.37135	3.49611	3.02012	2.47057	1.41069	1.93731	2.79322	1.84847	4.48503
	Contr. PS 2	ps	ctr	3.12445	3.63372	3.22522	2.76925	2.58339	1.47819	1.8474	2.74153	2.69326	4.77376
	Contr. PS 3	ps	ctr	3.17114	3.47096	3.36236	3.29313	2.63477	1.38964	1.72744	2.55881	2.52267	4.82646
	Contr. PS 4	ps	ctr	2.67955	3.57117	3.02025	2.81037	2.54092	1.26306	2.0209	2.74877	2.19096	4.60981
	Contr. PS1	ps	ctr	2.40402	3.45229	2.93472	2.78335	2.34515	1.4877	1.8495	2.81491	2.44092	4.83445
	Ctrl. Rop 1	rop	ctr	3.07573	3.44405	2.93417	2.92561	2.02063	1.10115	1.99767	2.86472	2.19543	4.6149
	Ctrl. Rop 2	rop	ctr	2.98587	3.59268	3.14124	3.26284	2.6669	1.08295	2.41849	3.15889	2.67435	4.80873
	Ctrl. Rop 3	rop	ctr	2.30213	4.15621	2.81925	3.02608	2.0824	0.936001	1.87857	2.53401	2.20791	4.64155
	Ctrl. Rop 4	rop	ctr	2.46843	3.37158	2.79332	3.09754	2.13197	1.16032	1.9662	2.70573	2.51437	4.21691
	Ctrl. Koi 2	koi	ctr	2.47731	3.58543	1.70623	3.56998	2.1705	1.34431	2.72611	2.74024	2.64277	4.31077
	Ctrl. Koi 3	koi	ctr	3.20368	3.83957	2.64959	3.59348	2.21335	1.42698	2.68523	2.85204	3.08045	4.75948
	Ctrl. Koi 4	koi	ctr	2.66021	3.58623	2.5174	3.46573	2.06289	1.28415	2.38038	2.92804	2.52238	4.894
	Ctrl. Koi 1	koi	ctr	3.525	3.99832	3.04576	3.62357	2.04172	1.5153	2.59488	2.83261	2.73379	5.17855
	ctr vs. cev11d	0.483	1.106	0.476	No																			cev11d vs. ctr	1.361	5.743	<0,001	Yes
	cev11d vs. cev6d	0.0213	0.0488	0.961	No																			cev6d vs. cev11d	0.125	0.528	0.601	No

	Comparisons for factor: Col 3 within rop																							Comparisons for factor: Col 3 within rop
	Comparison	Diff of Means	t	P	P<0,05																			Comparison	Diff of Means	t	P	P<0,05
	ctr vs. cev11d	0.352	0.805	0.811	No																			cev11d vs. ctr	0.963	4.063	<0,001	Yes
	ctr vs. cev6d	0.318	0.728	0.72	No																			cev6d vs. ctr	0.906	3.822	<0,001	Yes
	cev6d vs. cev11d	0.0337	0.0772	0.939	No																			cev11d vs. cev6d	0.0573	0.242	0.81	No


	Comparisons for factor: Col 2 within cev6d																							Comparisons for factor: Col 2 within cev6d
	Comparison	Diff of Means	t	P	P<0,05																			Comparison	Diff of Means	t	P	P<0,05
	rop vs. as	0.386	0.884	0.944	No																			ps vs. rop	0.472	1.989	0.284	No
	ps vs. as	0.337	0.771	0.948	No																			koi vs. rop	0.321	1.353	0.639	No
	koi vs. as	0.251	0.573	0.966	No																			ps vs. as	0.248	1.045	0.764	No
	rop vs. koi	0.136	0.311	0.986	No																			as vs. rop	0.224	0.944	0.727	No
	ps vs. koi	0.0862	0.197	0.976	No																			ps vs. koi	0.151	0.636	0.778	No
	rop vs. ps	0.0497	0.114	0.91	No																			koi vs. as	0.097	0.409	0.685	No


	Comparisons for factor: Col 2 within cev11d																							Comparisons for factor: Col 2 within cev11d
	Comparison	Diff of Means	t	P	P<0,05																			Comparison	Diff of Means	t	P	P<0,05
	as vs. koi	0.854	1.954	0.303	No																			ps vs. koi	0.564	2.378	0.129	No
	ps vs. koi	0.76	1.74	0.377	No																			ps vs. as	0.414	1.746	0.373	No
	rop vs. koi	0.755	1.727	0.322	No																			ps vs. rop	0.289	1.219	0.649	No
	as vs. rop	0.099	0.227	0.994	No																			rop vs. koi	0.275	1.159	0.585	No
	as vs. ps	0.0936	0.214	0.972	No																			as vs. koi	0.15	0.631	0.781	No
	ps vs. rop	0.00539	0.0123	0.99	No																			rop vs. as	0.125	0.527	0.601	No


	Comparisons for factor: Col 2 within ctr																							Comparisons for factor: Col 2 within ctr
	Comparison	Diff of Means	t	P	P<0,05																			Comparison	Diff of Means	t	P	P<0,05
	koi vs. rop	0.37	0.893	0.942	No																			as vs. ps	0.345	1.457	0.633	No
	as vs. rop	0.322	0.738	0.956	No																			koi vs. ps	0.27	1.198	0.744	No
	koi vs. ps	0.233	0.563	0.968	No																			as vs. rop	0.236	0.996	0.793	No
	as vs. ps	0.186	0.425	0.965	No																			koi vs. rop	0.16	0.713	0.859	No
	ps vs. rop	0.137	0.313	0.94	No																			rop vs. ps	0.109	0.46	0.876	No
	koi vs. as	0.0478	0.115	0.909	No																			as vs. koi	0.0758	0.337	0.738	No
[truncated: 30 more columns]

## Sheet: Mucosal response- Koi and AS 
									Gill
																																														il1b
																																		CEV												AS CEV GILL 2		603.675
	40s			il1b			il10			tnf2a			mx2			gzma			IGM			CD4			CD8B1			Muc5b			IL6A			norm												AS CEV GILL 3		792.581
																																		Gill												AS CEV GILL 4		275.742
	Sample Name	Quantity Mean		Sample Name	Quantity Mean																													il1b	il10	tnf2a	mx2	gzma	igm	cd4	cd8b1	Muc 5b	IL6A			AS CEV GILL 5		561.948
	AS CEV GILL 2	103586		AS CEV GILL 2	625.324		AS CEV GILL 2	99.7556		AS CEV GILL 2	4.22027		AS CEV GILL 2	22233.6		AS CEV GILL 2	1099.83		AS CEV GILL 2	7408.92		AS CEV GILL 2	2678.27		AS CEV GILL 2	1308.31		AS CEV GILL 2		33032.7	AS CEV GILL 2	700.446		603.675	96.3021	4.07417	21463.8	1061.75	7152.42	2585.55	1263.02	31889.1	676.197			AS CEV GILL 6		2136.25
	AS CEV GILL 3	266686		AS CEV GILL 3	2113.71		AS CEV GILL 3	198.453		AS CEV GILL 3	7.4256		AS CEV GILL 3	25485.3		AS CEV GILL 3	1461.35		AS CEV GILL 3	12577.3		AS CEV GILL 3	2963.39		AS CEV GILL 3	962.897		AS CEV GILL 3		24217.9	AS CEV GILL 3	1608.81		792.581	74.4145	2.7844	9556.28	547.965	4716.13	1111.19	361.06	9081.04	603.259					874.039
	AS CEV GILL 4	142177		AS CEV GILL 4	392.043		AS CEV GILL 4	75.0128		AS CEV GILL 4	1.41702		AS CEV GILL 4	12167.5		AS CEV GILL 4	566.246		AS CEV GILL 4	4487.35		AS CEV GILL 4	1801.33		AS CEV GILL 4	917.644		AS CEV GILL 4		12754.1	AS CEV GILL 4	634.474		275.742	52.76	0.996659	8557.98	398.267	3156.16	1266.96	645.422	8970.55	446.255					729.428
	AS CEV GILL 5	30938.6		AS CEV GILL 5	173.859		AS CEV GILL 5	42.2644		AS CEV GILL 5	0.434022		AS CEV GILL 5	2805.33		AS CEV GILL 5	88.8158		AS CEV GILL 5	611.42		AS CEV GILL 5	478.387		AS CEV GILL 5	182.534		AS CEV GILL 5		4327.66	AS CEV GILL 5	196.788		561.948	136.607	1.40285	9067.42	287.071	1976.24	1546.25	589.989	13987.9	636.059
	AS CEV GILL 6	75917.7		AS CEV GILL 6	1621.79		AS CEV GILL 6	130.923		AS CEV GILL 6	2.36532		AS CEV GILL 6	14112.3		AS CEV GILL 6	274.289		AS CEV GILL 6	3208.33		AS CEV GILL 6	593.375		AS CEV GILL 6	314.822		AS CEV GILL 6		12918	AS CEV GILL 6	272.235		2136.25	172.454	3.11564	18589	361.298	4226.06	781.603	414.689	17015.8	358.592			KOI CEV GILL 1		10416.8
	KOI CEV GILL 1	150083		KOI CEV GILL 1	15633.9		KOI CEV GILL 1	672.225		KOI CEV GILL 1	15.7221		KOI CEV GILL 1	88123.9		KOI CEV GILL 1	815.901		KOI CEV GILL 1	3216.6		KOI CEV GILL 1	3877.27		KOI CEV GILL 1	552.792		KOI CEV GILL 1		24357.9	KOI CEV GILL 1	1908.82		10416.8	447.901	10.4756	58716.6	543.632	2143.21	2583.41	368.323	16229.6	1271.84			KOI CEV GILL 2		33095.7
	KOI CEV GILL 2	94723.7		KOI CEV GILL 2	31349.5		KOI CEV GILL 2	238.82		KOI CEV GILL 2	16.6172		KOI CEV GILL 2	36968.3		KOI CEV GILL 2	371.506		KOI CEV GILL 2	1268.96		KOI CEV GILL 2	1905.34		KOI CEV GILL 2	289.853		KOI CEV GILL 2		15184.4	KOI CEV GILL 2	1432.35		33095.7	252.122	17.5429	39027.5	392.199	1339.65	2011.47	305.999	16030.2	1512.14			KOI CEV GILL 3		37246.6
	KOI CEV GILL 3	64031.9		KOI CEV GILL 3	23849.7		KOI CEV GILL 3	210.98		KOI CEV GILL 3	23.6545		KOI CEV GILL 3	26391.6		KOI CEV GILL 3	500.469		KOI CEV GILL 3	13316.8		KOI CEV GILL 3	895.206		KOI CEV GILL 3	466.557		KOI CEV GILL 3		18728.7	KOI CEV GILL 3	1314.27		37246.6	329.492	36.9418	41216.4	781.593	20797.2	1398.06	728.633	29249.1	2052.52			KOI CEV GILL 4		62295.3
	KOI CEV GILL 4	111377		KOI CEV GILL 4	69382.4		KOI CEV GILL 4	396.905		KOI CEV GILL 4	40.0864		KOI CEV GILL 4	55449		KOI CEV GILL 4	604.679		KOI CEV GILL 4	1458.66		KOI CEV GILL 4	2703.52		KOI CEV GILL 4	294.033		KOI CEV GILL 4		26616.2	KOI CEV GILL 4	2624.72		62295.3	356.362	35.9917	49785.1	542.913	1309.66	2427.37	263.999	23897.5	2356.62			KOI CEV GILL 5		29487.5
	KOI CEV GILL 5	151508		KOI CEV GILL 5	44676		KOI CEV GILL 5	612.429		KOI CEV GILL 5	26.5393		KOI CEV GILL 5	75591.2		KOI CEV GILL 5	451.461		KOI CEV GILL 5	9361.23		KOI CEV GILL 5	2214.79		KOI CEV GILL 5	518.598		KOI CEV GILL 5		11608.4	KOI CEV GILL 5	2652.45		29487.5	404.222	17.5168	49892.5	297.978	6178.69	1461.83	342.29	7661.87	1750.7					34508.4
	CTR AS GILL 1	132480		CTR AS GILL 1	333.277		CTR AS GILL 1	187.398		CTR AS GILL 1	2.16751		CTR AS GILL 1	239.803		CTR AS GILL 1	1182.83		CTR AS GILL 1	13390.6		CTR AS GILL 1	1774.36		CTR AS GILL 1	1113.27		CTR AS GILL 1		19088	CTR AS GILL 1	545.215		251.567	141.454	1.63611	181.01	892.834	10107.6	1339.34	840.331	14408.2	411.545					18622.7
	CTR AS GILL 2	92799.4		CTR AS GILL 2	543.941		CTR AS GILL 2	241.564		CTR AS GILL 2	3.72565		CTR AS GILL 2	247.306		CTR AS GILL 2	991.735		CTR AS GILL 2	7836.84		CTR AS GILL 2	2343.34		CTR AS GILL 2	935.016		CTR AS GILL 2		23374.3	CTR AS GILL 2	546.255		586.147	260.308	4.01473	266.495	1068.69	8444.92	2525.17	1007.57	25188	588.641
	CTR AS GILL 3	157471		CTR AS GILL 3	741.184		CTR AS GILL 3	290.512		CTR AS GILL 3	2.38402		CTR AS GILL 3	630.972		CTR AS GILL 3	1554.55		CTR AS GILL 3	16160.2		CTR AS GILL 3	4416.53		CTR AS GILL 3	1936.64		CTR AS GILL 3		38071.1	CTR AS GILL 3	1078.76		470.679	184.486	1.51394	400.691	987.197	10262.3	2804.66	1229.84	24176.6	685.05			CTR AS GILL 1		251.567
	CTR AS GILL 4	58625.1		CTR AS GILL 4	325.743		CTR AS GILL 4	55.508		CTR AS GILL 4	0.596192		CTR AS GILL 4	138.294		CTR AS GILL 4	420.119		CTR AS GILL 4	4749.47		CTR AS GILL 4	1013.28		CTR AS GILL 4	881.302		CTR AS GILL 4		7148.9	CTR AS GILL 4	145.632		555.637	94.683	1.01696	235.895	716.621	8101.43	1728.41	1503.28	12194.3	248.412			CTR AS GILL 2		586.147
	CTR AS GILL 6	124881		CTR AS GILL 6	760.532		CTR AS GILL 6	190.419		CTR AS GILL 6	3.65113		CTR AS GILL 6	256.316		CTR AS GILL 6	1011.12		CTR AS GILL 6	5598.58		CTR AS GILL 6	2671.84		CTR AS GILL 6	1039.48		CTR AS GILL 6		23190.7	CTR AS GILL 6	598.134		609.006	152.481	2.9237	205.248	809.665	4483.14	2139.51	832.377	18570.3	478.964			CTR AS GILL 3		470.679
	CTR KOI GILL 2	39985.5		CTR KOI GILL 2	254.594		CTR KOI GILL 2	56.11		CTR KOI GILL 2	0.661943		CTR KOI GILL 2	76.7029		CTR KOI GILL 2	461.962		CTR KOI GILL 2	744.128		CTR KOI GILL 2	1320.53		CTR KOI GILL 2	398.437		CTR KOI GILL 2		11882.2	CTR KOI GILL 2	344.227		636.716	140.326	1.65546	191.827	1155.32	1860.99	3302.52	996.454	29716.2	860.879			CTR AS GILL 4		555.637
	CTR KOI GILL 3	22767.7		CTR KOI GILL 3	292.044		CTR KOI GILL 3	53.8469		CTR KOI GILL 3	0.313597		CTR KOI GILL 3	28.9074		CTR KOI GILL 3	342.062		CTR KOI GILL 3	236.773		CTR KOI GILL 3	1144.62		CTR KOI GILL 3	687.517		CTR KOI GILL 3		2659.69	CTR KOI GILL 3	319.938		1282.71	236.505	1.37738	126.967	1502.4	1039.95	5027.37	3019.7	11681.9	1405.23			CTR AS GILL 6		609.006
	CTR KOI GILL 4	98387		CTR KOI GILL 4	1831.53		CTR KOI GILL 4	135.123		CTR KOI GILL 4	1.44531		CTR KOI GILL 4	180.443		CTR KOI GILL 4	572.389		CTR KOI GILL 4	14249.6		CTR KOI GILL 4	2307.58		CTR KOI GILL 4	623.823		CTR KOI GILL 4		12140.4	CTR KOI GILL 4	762.83		1861.55	137.338	1.46901	183.402	581.773	14483.2	2345.41	634.05	12339.4	775.336					494.607
	CTR KOI GILL 5	20645		CTR KOI GILL 5	360.702		CTR KOI GILL 5	23.1515		CTR KOI GILL 5	1.92825		CTR KOI GILL 5	109.689		CTR KOI GILL 5	154.539		CTR KOI GILL 5	1589.21		CTR KOI GILL 5	591.497		CTR KOI GILL 5	104.039		CTR KOI GILL 5		6599.98	CTR KOI GILL 5	235.307		1747.17	112.141	9.34007	531.311	748.553	7697.8	2865.09	503.944	31968.9	1139.78					145.63
	CTR KOI GILL 6	56813		CTR KOI GILL 6			CTR KOI GILL 6	157.908		CTR KOI GILL 6	0.585777		CTR KOI GILL 6	246.916		CTR KOI GILL 6	535.001		CTR KOI GILL 6	11339.2		CTR KOI GILL 6	2703.11		CTR KOI GILL 6	532.326		CTR KOI GILL 6		22940.2	CTR KOI GILL 6	437.034			277.943	1.03106	434.612	941.687	19958.8	4757.91	936.979	40378.4	769.25
																																														CTR KOI GILL 2		636.716
																																														CTR KOI GILL 3		1282.71
																																														CTR KOI GILL 4		1861.55
																																														CTR KOI GILL 5		1747.17
																																														CTR KOI GILL 6
																																																1382.04
																																																556.364
																																													IL1b Mean
																																															Ctr	5d
																																														AS	494.607	874.039
																																														KOI	1382.04	34508.4
																																													IL1b Sd
																																															Ctr	5d
																																														AS	145.63	729.428
																																														KOI	556.364	18622.7
									Gut
																																		CEV											il1b
		40s		il1b			IL10			TNFa2			MX2			GZMA			IGM			CD4			CD8B1			muc2c			IL6A			norm
																																		Gill											AS CEV GUT 2		450.479
	Sample Name			Sample Name			Sample Name			Sample Name			Sample Name			Sample Name			Sample Name			Sample Name			Sample Name			Sample Name			Sample Name	Quantity Mean		il1b	IL10	TNFa2	MX2	GZMA	IGM	CD4	CD8B1	muc2	il6a		AS CEV GUT 3		71.5969
	AS CEV GUT 2	273169		AS CEV GUT 2	450.479		AS CEV GUT 2	158.682		AS CEV GUT 2	10.3418		AS CEV GUT 2	24000.6		AS CEV GUT 2	896.69		AS CEV GUT 2	810.694		AS CEV GUT 2	2413.23		AS CEV GUT 2	1632.18		AS CEV GUT 2	29431.4	11113	AS CEV GUT 2	1867.41		164.908	58.0892	3.78586	8785.98	328.255	296.774	883.42	597.499	10774.1	683.611		AS CEV GUT 5		143.986
	AS CEV GUT 3	162114		AS CEV GUT 3	71.5969		AS CEV GUT 3	76.3311		AS CEV GUT 3	2.96823		AS CEV GUT 3	8791.56		AS CEV GUT 3	661.813		AS CEV GUT 3	1552.54		AS CEV GUT 3	1235.6		AS CEV GUT 3	586.382		AS CEV GUT 3	16869.4	366.031	AS CEV GUT 3	762.34		44.1646	47.0849	1.83095	5423.08	408.24	957.685	762.179	361.711	10405.9	470.251		AS CEV GUT 6		82.1043
	AS CEV GUT 5	128379		AS CEV GUT 5	143.986		AS CEV GUT 5	63.6593		AS CEV GUT 5	2.18737		AS CEV GUT 5	8011.67		AS CEV GUT 5	1016.68		AS CEV GUT 5	9352.13		AS CEV GUT 5	1728.04		AS CEV GUT 5	961.498		AS CEV GUT 5		15275.5	AS CEV GUT 5	594.633		112.157	49.5871	1.70384	6240.66	791.937	7284.8	1346.05	748.955	0	463.187				187.041
	AS CEV GUT 6	103875		AS CEV GUT 6	82.1043		AS CEV GUT 6	100.337		AS CEV GUT 6	1.64281		AS CEV GUT 6	6255.5		AS CEV GUT 6	583.97		AS CEV GUT 6	1153.48		AS CEV GUT 6	2441.35		AS CEV GUT 6	1518.84		AS CEV GUT 6	18882	3055.6	AS CEV GUT 6	970.475		79.0416	96.5939	1.58153	6022.15	562.186	1110.45	2350.28	1462.18	18177.7	934.273				178.505
	KOI CEV GUT 1	94365.5		KOI CEV GUT 1	1056.69		KOI CEV GUT 1	112.06		KOI CEV GUT 1	14.8372		KOI CEV GUT 1	22422.6		KOI CEV GUT 1	485.17		KOI CEV GUT 1	128.362		KOI CEV GUT 1	1902.3		KOI CEV GUT 1	631.935		KOI CEV GUT 1	45962.7	993.763	KOI CEV GUT 1	1992.96		1119.78	118.751	15.7231	23761.4	514.139	136.027	2015.89	669.667	48707.1	2111.96
	KOI CEV GUT 3	136022		KOI CEV GUT 3	1469.41		KOI CEV GUT 3	97.82		KOI CEV GUT 3	36.6439		KOI CEV GUT 3	6404.45		KOI CEV GUT 3	416.048		KOI CEV GUT 3	5347.39		KOI CEV GUT 3	910.806		KOI CEV GUT 3	942.138		KOI CEV GUT 3	20027.1	464.883	KOI CEV GUT 3	1809.2		1080.27	71.9148	26.9397	4708.39	305.868	3931.26	669.602	692.636	14723.4	1330.08		KOI CEV GUT 1		1056.69
	KOI CEV GUT 4	112606		KOI CEV GUT 4	1268.95		KOI CEV GUT 4	131.7		KOI CEV GUT 4	16.6268		KOI CEV GUT 4	18248.4		KOI CEV GUT 4	293.111		KOI CEV GUT 4	310.662		KOI CEV GUT 4	178.555		KOI CEV GUT 4	329.768		KOI CEV GUT 4	32695.3	412.954	KOI CEV GUT 4	1946.62		1126.89	116.956	14.7654	16205.5	260.297	275.883	158.565	292.85	29035	1728.69		KOI CEV GUT 3		1469.41
	KOI CEV GUT 5	109962		KOI CEV GUT 5	1019.26		KOI CEV GUT 5	76.908		KOI CEV GUT 5	7.26475		KOI CEV GUT 5	11234.2		KOI CEV GUT 5	371.71		KOI CEV GUT 5	1032.34		KOI CEV GUT 5	673.752		KOI CEV GUT 5	442.177		KOI CEV GUT 5	9827.07	3200.48	KOI CEV GUT 5	1275.4		926.922	69.9404	6.60659	10216.4	338.035	938.813	612.713	402.118	8936.77	1159.85		KOI CEV GUT 4		1268.95
	KOI CEV GUT 6	125441		KOI CEV GUT 6	322.423		KOI CEV GUT 6	166.924		KOI CEV GUT 6	3.36398		KOI CEV GUT 6	21328.8		KOI CEV GUT 6	669.994		KOI CEV GUT 6	3441.4		KOI CEV GUT 6	1835.06		KOI CEV GUT 6	767.909		KOI CEV GUT 6	34846.2	3147.42	KOI CEV GUT 6	2294.76		257.031	133.069	2.68172	17003	534.109	2743.44	1462.88	612.166	27778.9	1829.35		KOI CEV GUT 5		1019.26
	CTR AS GUT 2	132621		CTR AS GUT 2	68.7409		CTR AS GUT 2	52.9022		CTR AS GUT 2	0.909812		CTR AS GUT 2	46.8541		CTR AS GUT 2	431.326		CTR AS GUT 2	623.367		CTR AS GUT 2	1170.22		CTR AS GUT 2	930.965		CTR AS GUT 2	23215.7	40808.8	CTR AS GUT 2	809.077		51.8327	39.8899	0.686026	35.3294	325.233	470.038	882.381	701.976	17505.4	610.069		KOI CEV GUT 6		322.423
	CTR AS GUT 3	101776		CTR AS GUT 3	130.56		CTR AS GUT 3	59.8896		CTR AS GUT 3	0.673606		CTR AS GUT 3	16.4802		CTR AS GUT 3	332.353		CTR AS GUT 3	1703.54		CTR AS GUT 3	1542.89		CTR AS GUT 3	1199.12		CTR AS GUT 3	19959.9		CTR AS GUT 3	661.013		128.282	58.8447	0.661852	16.1927	326.554	1673.81	1515.97	1178.2	19611.6	649.48				1027.35
	CTR AS GUT 4	154656		CTR AS GUT 4	80.3801		CTR AS GUT 4	84.5438		CTR AS GUT 4	2.30496		CTR AS GUT 4	43.5919		CTR AS GUT 4	647.074		CTR AS GUT 4	224.321		CTR AS GUT 4	1820.77		CTR AS GUT 4	1697.41		CTR AS GUT 4	32256.3	18611.1	CTR AS GUT 4	904.963		51.9736	54.6659	1.49038	28.1864	418.397	145.045	1177.31	1097.54	20856.9	585.147				433.485
	CTR AS GUT 5	150285		CTR AS GUT 5	173.581		CTR AS GUT 5	181.206		CTR AS GUT 5	1.71844		CTR AS GUT 5	156.593		CTR AS GUT 5	567.275		CTR AS GUT 5	24747.6		CTR AS GUT 5	2710.29		CTR AS GUT 5	1194.96		CTR AS GUT 5	36736.4	4958.62	CTR AS GUT 5	1003.07		115.502	120.575	1.14346	104.198	377.468	16467.1	1803.44	795.134	24444.5	667.447
	CTR AS GUT 6	118971		CTR AS GUT 6	196.351		CTR AS GUT 6	85.3869		CTR AS GUT 6	3.62272		CTR AS GUT 6	162.079		CTR AS GUT 6	736.104		CTR AS GUT 6	17137.1		CTR AS GUT 6	1919.38		CTR AS GUT 6	1041.49		CTR AS GUT 6		9763.6	CTR AS GUT 6	984.885		165.04	71.7709	3.04503	136.233	618.724	14404.4	1613.32	875.408	0	827.833		CTR AS GUT 2		68.7409
	CTR KOI GUT 1	204043		CTR KOI GUT 1	150.135		CTR KOI GUT 1	26.2147		CTR KOI GUT 1	1.13935		CTR KOI GUT 1	54.7837		CTR KOI GUT 1	390.679		CTR KOI GUT 1	113.297		CTR KOI GUT 1	913.651		CTR KOI GUT 1	491.281		CTR KOI GUT 1	17435.6	3815.64	CTR KOI GUT 1	1011.16		73.5799	12.8476	0.558388	26.8491	191.469	55.5261	447.774	240.773	8545.06	495.562		CTR AS GUT 3		130.56
	CTR KOI GUT 2	124114		CTR KOI GUT 2	79.5663		CTR KOI GUT 2	39.3614		CTR KOI GUT 2	0.361089		CTR KOI GUT 2	17.3853		CTR KOI GUT 2	390.057		CTR KOI GUT 2	180.084		CTR KOI GUT 2	1248.59		CTR KOI GUT 2	455.093		CTR KOI GUT 2	11388.4	25745.5	CTR KOI GUT 2	762.596		64.1074	31.7138	0.290933	14.0075	314.273	145.095	1006	366.673	9175.73	614.431		CTR AS GUT 4		80.3801
	CTR KOI GUT 3	87597.9		CTR KOI GUT 3	82.1086		CTR KOI GUT 3	35.7305		CTR KOI GUT 3	3.8487		CTR KOI GUT 3	49.4544		CTR KOI GUT 3	438.32		CTR KOI GUT 3	190.225		CTR KOI GUT 3	1358.98		CTR KOI GUT 3	1565.58		CTR KOI GUT 3	38350.5	6909.15	CTR KOI GUT 3	1188.17		93.7336	40.7892	4.3936	56.4561	500.377	217.157	1551.38	1787.24	43780.2	1356.39		CTR AS GUT 5		173.581
	CTR KOI GUT 4	142909		CTR KOI GUT 4	273.94		CTR KOI GUT 4	25.464		CTR KOI GUT 4	8.5242		CTR KOI GUT 4	129.003		CTR KOI GUT 4	297.449		CTR KOI GUT 4	9693.42		CTR KOI GUT 4	789.324		CTR KOI GUT 4	417.012		CTR KOI GUT 4	18647.8	32225.2	CTR KOI GUT 4	682.181		191.688	17.8183	5.96478	90.2695	208.139	6782.93	552.326	291.802	13048.7	477.353		CTR AS GUT 6		196.351
	CTR KOI GUT 5	152339		CTR KOI GUT 5	253.506		CTR KOI GUT 5			CTR KOI GUT 5	9.75155		CTR KOI GUT 5	161.371		CTR KOI GUT 5	560.08		CTR KOI GUT 5	12062		CTR KOI GUT 5	1125.08		CTR KOI GUT 5	724.96		CTR KOI GUT 5		14913	CTR KOI GUT 5	1419.69		166.41		6.40122	105.929	367.654	7917.89	738.539	475.886	0	931.93				129.923
																																															55.9394
																																													CTR KOI GUT 1		150.135
																																													CTR KOI GUT 2		79.5663
																																													CTR KOI GUT 3		82.1086
																																													CTR KOI GUT 4		273.94
																																													CTR KOI GUT 5		253.506
																																															167.851
																																															92.2651
																																																	1L10 Mean
																																														Ctr	5d
																																													AS	129.923	187.041
																																													KOI	167.851	1027.35
																																																	IL10 Sd
																																														Ctr	5d
																																													AS	55.9394	178.505
																																													KOI	92.2651	433.485
									Skin																																				il1b				il10
																																													AS CEV SKIN 1		396.028		AS CEV SKIN 1
																																		CEV											AS CEV SKIN 2		1420.24		AS CEV SKIN 2
		40s		il1b			il10			TNFA2			MX2			GZMA			IGM			CD4			CD8B1			muc5b			IL6a			norm											AS CEV SKIN 5		412.857		AS CEV SKIN 5
																																		Gill											AS CEV SKIN 6		9387.15		AS CEV SKIN 6
	Sample Name			Sample Name			Sample Name			Sample Name			Sample Name			Sample Name			Sample Name			Sample Name			Sample Name		Sample Name	Quantity Mean			Sample Name			IL1B	IL10	tnfa2	MX2	GZMA	IGM	CD4	CD8B1	muc5b	IL6a				2904.07
	AS CEV SKIN 1	48983.2		AS CEV SKIN 1	193.987		AS CEV SKIN 1	127.013		AS CEV SKIN 1	2.9903		AS CEV SKIN 1	11308.5		AS CEV SKIN 1	67.5428		AS CEV SKIN 1	5396.45		AS CEV SKIN 1	1067.98		AS CEV SKIN 1	328.865	AS CEV SKIN 1		11113		AS CEV SKIN 1	202.573		396.028	259.299	6.10475	23086.4	137.89	11016.9	2180.3	671.383	22687.3	413.556				4348.5
	AS CEV SKIN 2	13745.1		AS CEV SKIN 2	195.213		AS CEV SKIN 2	77.4728		AS CEV SKIN 5	6.06057		AS CEV SKIN 2	1001.22		AS CEV SKIN 2	18.915		AS CEV SKIN 2	103.213		AS CEV SKIN 2	1058.9		AS CEV SKIN 2	296.624	AS CEV SKIN 2		366.031		AS CEV SKIN 2	251.711		1420.24	563.641	44.0927	7284.22	137.613	750.908	7703.83	2158.04	2663	1831.28
	AS CEV SKIN 5	75170.4		AS CEV SKIN 5	310.346		AS CEV SKIN 5	133.811		AS CEV SKIN 6	0.885531		AS CEV SKIN 5	11566.8		AS CEV SKIN 5	353.443		AS CEV SKIN 5	5988.57		AS CEV SKIN 5	3022.16		AS CEV SKIN 5	698.991	AS CEV SKIN 5		15275.5		AS CEV SKIN 5	716.74		412.857	178.011	1.17803	15387.4	470.189	7966.66	4020.41	929.875	20321.2	953.487		KOI CEV SKIN 1		7625.93		KOI CEV SKIN 1
	AS CEV SKIN 6	14294.1		AS CEV SKIN 6	1341.81		AS CEV SKIN 6	54.6699		KOI CEV SKIN 1	17.7878		AS CEV SKIN 6	5126.95		AS CEV SKIN 6	94.3091		AS CEV SKIN 6	1374.01		AS CEV SKIN 6	611.448		AS CEV SKIN 6	244.595	AS CEV SKIN 6		3055.6		AS CEV SKIN 6	178.146		9387.15	382.465	124.442	35867.7	659.778	9612.46	4277.63	1711.17	21376.7	1246.29		KOI CEV SKIN 3		18331.3		KOI CEV SKIN 3
	KOI CEV SKIN 1	97376.1		KOI CEV SKIN 1	7425.83		KOI CEV SKIN 1	256.487		KOI CEV SKIN 3	6.51624		KOI CEV SKIN 1	9895.43		KOI CEV SKIN 1	109.91		KOI CEV SKIN 1	1801.85		KOI CEV SKIN 1	2250.66		KOI CEV SKIN 1	592.992	KOI CEV SKIN 1		993.763		KOI CEV SKIN 1	1228.83		7625.93	263.398	6.69183	10162.1	112.871	1850.41	2311.3	608.971	1020.54	1261.94		KOI CEV SKIN 4		14513.4		KOI CEV SKIN 4
	KOI CEV SKIN 3	44277.6		KOI CEV SKIN 3	8116.66		KOI CEV SKIN 3	220.739		KOI CEV SKIN 4	11.4282		KOI CEV SKIN 3	3604.83		KOI CEV SKIN 3	82.9453		KOI CEV SKIN 3	4039.28		KOI CEV SKIN 3	2075.56		KOI CEV SKIN 3	730.47	KOI CEV SKIN 3		464.883		KOI CEV SKIN 3	772.808		18331.3	498.533	25.8103	8141.42	187.33	9122.63	4687.61	1649.75	1049.93	1745.37		KOI CEV SKIN 5		14863.9		KOI CEV SKIN 5
	KOI CEV SKIN 4	103382		KOI CEV SKIN 4	15004.2		KOI CEV SKIN 4	175.839		KOI CEV SKIN 5	17.7548		KOI CEV SKIN 4	6393.7		KOI CEV SKIN 4	80.2093		KOI CEV SKIN 4	3339.2		KOI CEV SKIN 4	2835.71		KOI CEV SKIN 4	799.85	KOI CEV SKIN 4		412.954		KOI CEV SKIN 4	1175.36		14513.4	170.087	17.174	6184.54	77.5855	3229.97	2742.94	773.686	399.446	1136.91		KOI CEV SKIN 6		5507.67		KOI CEV SKIN 6
	KOI CEV SKIN 5	69847.1		KOI CEV SKIN 5	10382		KOI CEV SKIN 5	134.5		KOI CEV SKIN 6	3.69772		KOI CEV SKIN 5	3479.92		KOI CEV SKIN 5			KOI CEV SKIN 5	1298.22		KOI CEV SKIN 5	1172.91		KOI CEV SKIN 5	84.0177	KOI CEV SKIN 5		3200.48		KOI CEV SKIN 5	785.292		14863.9	192.564	5.29403	4982.21	0	1858.66	1679.25	120.288	4582.12	1124.3				12168.4
	KOI CEV SKIN 6	60948.4		KOI CEV SKIN 6	3356.84		KOI CEV SKIN 6	134.022		AS CTR SKIN 1	4.40392		KOI CEV SKIN 6	9597.96		KOI CEV SKIN 6	50.6367		KOI CEV SKIN 6	5859.57		KOI CEV SKIN 6	2001.6		KOI CEV SKIN 6	512.552	KOI CEV SKIN 6		3147.42		KOI CEV SKIN 6	779.995		5507.67	219.895	7.22566	15747.7	83.0814	9613.99	3284.09	840.961	5164.07	1279.76				5379.24
	AS CTR SKIN 1	139032		AS CTR SKIN 1	313.736		AS CTR SKIN 1	159.547		AS CTR SKIN 2			AS CTR SKIN 1	542.939		AS CTR SKIN 1	433.53		AS CTR SKIN 1	19249.8		AS CTR SKIN 1	2731.53		AS CTR SKIN 1	890.793	AS CTR SKIN 1		40808.8		AS CTR SKIN 1	969.38		225.658	114.756		390.514	311.821	13845.6	1964.68	640.712	29352.1	697.237
	AS CTR SKIN 2	7740.72		AS CTR SKIN 2	22.1083		AS CTR SKIN 2	121.331		AS CTR SKIN 3	4.52246		AS CTR SKIN 2	9.67921		AS CTR SKIN 2	5.15429		AS CTR SKIN 2	288.374		AS CTR SKIN 2	1447.05		AS CTR SKIN 2	412.8	AS CTR SKIN 2				AS CTR SKIN 2	223.88		285.611	1567.43	58.4243	125.043	66.5868	3725.42	18694.1	5332.84		2892.24		AS CTR SKIN 1		225.658		AS CTR SKIN 1
	AS CTR SKIN 3	139686		AS CTR SKIN 3	202.157		AS CTR SKIN 3	166.99		AS CTR SKIN 5	1.78979		AS CTR SKIN 3	267.018		AS CTR SKIN 3	273.723		AS CTR SKIN 3	20700		AS CTR SKIN 3	2390.57		AS CTR SKIN 3	790.628	AS CTR SKIN 3		18611.1		AS CTR SKIN 3	1182.58		144.722	119.546	1.28129	191.156	195.955	14818.9	1711.39	566.003	13323.5	846.598		AS CTR SKIN 2		285.611		AS CTR SKIN 2
	AS CTR SKIN 5	92529.9		AS CTR SKIN 5	466.427		AS CTR SKIN 5	151.442		AS CTR SKIN 6	0.8033		AS CTR SKIN 5	174.909		AS CTR SKIN 5			AS CTR SKIN 5	16075.5		AS CTR SKIN 5	1707.62		AS CTR SKIN 5	260.729	AS CTR SKIN 5		4958.62		AS CTR SKIN 5	556.701		504.082	163.668	0.868153	189.03	0	17373.3	1845.48	281.778	5358.93	601.644		AS CTR SKIN 3		144.722		AS CTR SKIN 3
	AS CTR SKIN 6	105800		AS CTR SKIN 6	390.819		AS CTR SKIN 6	97.5125		KOI CTR SKIN 2	2.19696		AS CTR SKIN 6	107.227		AS CTR SKIN 6	106.88		AS CTR SKIN 6	2577.91		AS CTR SKIN 6	1545.8		AS CTR SKIN 6	364.606	AS CTR SKIN 6		9763.6		AS CTR SKIN 6	591.34		369.393	92.1666	2.07651	101.349	101.02	2436.58	1461.05	344.618	9228.34	558.921		AS CTR SKIN 5		504.082		AS CTR SKIN 5
	KOI CTR SKIN 2	52052.4		KOI CTR SKIN 2	180.104		KOI CTR SKIN 2	103.984		KOI CTR SKIN 3	7.58754		KOI CTR SKIN 2	114.706		KOI CTR SKIN 2	119.86		KOI CTR SKIN 2	6397.69		KOI CTR SKIN 2	2414.02		KOI CTR SKIN 2	498.844	KOI CTR SKIN 2		3815.64		KOI CTR SKIN 2	785.479		346.006	199.768	14.5767	220.367	230.268	12290.9	4637.67	958.35	7330.38	1509.02		AS CTR SKIN 6		369.393		AS CTR SKIN 6
	KOI CTR SKIN 3	150393		KOI CTR SKIN 3	657.888		KOI CTR SKIN 3	122.7		KOI CTR SKIN 4	3.50157		KOI CTR SKIN 3	542.791		KOI CTR SKIN 3	404.194		KOI CTR SKIN 3	25822.7		KOI CTR SKIN 3	4484.26		KOI CTR SKIN 3	937.819	KOI CTR SKIN 3		25745.5		KOI CTR SKIN 3	1589.81		437.445	81.5861	2.32827	360.914	268.758	17170.1	2981.69	623.577	17118.8	1057.1				305.893
	KOI CTR SKIN 4	137465		KOI CTR SKIN 4	632.275		KOI CTR SKIN 4	187.654		KOI CTR SKIN 5	3.3833		KOI CTR SKIN 4	208.747		KOI CTR SKIN 4	141.375		KOI CTR SKIN 4	22753.4		KOI CTR SKIN 4	4470.43		KOI CTR SKIN 4	645.988	KOI CTR SKIN 4		6909.15		KOI CTR SKIN 4	1931.94		459.955	136.511	2.46121	151.855	102.845	16552.2	3252.06	469.93	5026.13	1405.41				137.964
	KOI CTR SKIN 5	166058		KOI CTR SKIN 5	963.896		KOI CTR SKIN 5	144.916		KOI CTR SKIN 6	5.5378		KOI CTR SKIN 5	234.755		KOI CTR SKIN 5	387.492		KOI CTR SKIN 5	15629.1		KOI CTR SKIN 5	4424.89		KOI CTR SKIN 5	454.697	KOI CTR SKIN 5		32225.2		KOI CTR SKIN 5	911.118		580.457	87.2682	3.33486	141.369	233.347	9411.84	2664.66	273.818	19406	548.674
	KOI CTR SKIN 6	145997		KOI CTR SKIN 6	565.688		KOI CTR SKIN 6	193.151					KOI CTR SKIN 6	312.599		KOI CTR SKIN 6	477.599		KOI CTR SKIN 6	37740.6		KOI CTR SKIN 6	6166.9		KOI CTR SKIN 6	366.515	KOI CTR SKIN 6		14913		KOI CTR SKIN 6	1465.69		387.466	132.298		214.114	327.13	25850.3	4223.99	251.043	10214.6	1003.92		KOI CTR SKIN 2		346.006		KOI CTR SKIN 2
																																													KOI CTR SKIN 3		437.445		KOI CTR SKIN 3
																																													KOI CTR SKIN 4		459.955		KOI CTR SKIN 4
																																													KOI CTR SKIN 5		580.457		KOI CTR SKIN 5
																																													KOI CTR SKIN 6		387.466		KOI CTR SKIN 6
																																															442.266
																																															89.0251
																																												IL1b Mean					1L10 Mean
																																														Ctr	5d
																																													AS	305.893	2904.07
																																													KOI	442.266	12168.4
																																												IL1b Sd
																																														Ctr	5d		IL10 Sd
																																													AS	137.964	4348.5
																																													KOI	89.0251	5379.24
[truncated: 28 more columns]
